# Supplementary material for: Alkylation of isatins with trichloroacetimidates
Source: Royal Society of Chemistry journal article supplement (doi:10.1039/d2ob00127f), 2022-01-01
Supplement: d2ob00127f1.pdf [file d2ob00127f1.pdf]

# Supporting Information

## Alkylation of Isatins with Trichloroacetimidates

*Nilamber A. Mate, Rowan I. L. Meador, Bhaskar D. Joshi, and John D. Chisholm\**

Department of Chemistry, Syracuse University, 1-014 Center for Science and Technology, Syracuse, NY

13244

*jdchisho@syr.edu*

### Contents

|                                                |        |
|------------------------------------------------|--------|
| Table of Contents                              | S1     |
| Experimental Procedures and Tabulated NMR Data | S2-S6  |
| NMR Spectra                                    | S7-S26 |
| References                                     | S27    |

## General Experimental Information

All anhydrous reactions were run under a positive pressure of argon. DCM (DCM) was dried by passage through an alumina column.<sup>1</sup> 1,2-Dichloroethane (DCE) was freshly distilled from calcium hydride before use. Tetrahydrofuran (THF) was freshly distilled from Na/benzophenone still before use. Silica gel column chromatography was performed using 60 Å silica gel (230–400 mesh). Melting points are uncorrected.

## Trichloroacetimidates

Most of the trichloroacetimidates shown in Figure S1 (7,<sup>2</sup> 30,<sup>3</sup> 32,<sup>3</sup> 34,<sup>4</sup> 36,<sup>5</sup> 38,<sup>6</sup> 40,<sup>4</sup> and 42<sup>4</sup>) were synthesized from the corresponding alcohols as reported previously. Trichloroacetimidates 46, 48 and 50 were purchased from commercial sources.

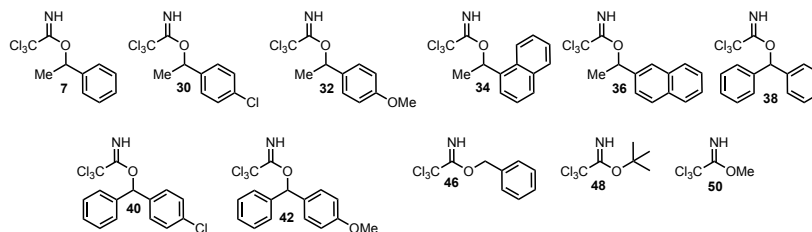

Figure S1

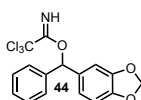

**1-[(2H-1,3-Benzodioxol-5-yl)phenylmethoxy]-2,2,2-trichloro-1-ethanimine 44.** A flame dried flask was charged with 2H-1,3benzodioxol-5-yl-2-phenylmethanol<sup>7</sup> (18.76 mmol, 2 g) in dry DCM (29 mL) and placed under argon. The flask was cooled to 0 °C and 1,8-diazabicyclo[5.4.0]undec-7-ene (0.88 mmol, 0.13 mL) was added to the solution, followed by trichloroacetonitrile (11.4 mmol, 1.1 mL). After ~22 h the reaction mixture was concentrated and the residue purified by silica gel column chromatography (10%EA/5% Et<sub>3</sub>N/85% hexanes) to provide imidate **44** a yellow solid. Yield: 67%; mp = 67-70 °C; TLC R<sub>f</sub> = 0.55 (10% EA/90% hexanes); IR (ATR) 3336, 3030, 2889, 1662, 1487, 1237, 1065, 786 cm<sup>-1</sup>; <sup>1</sup>H NMR (400 MHz, CDCl<sub>3</sub>) δ 8.32 (s, 1H), 7.35 (m, 2H), 7.28-7.24 (m, 2H), 7.22-7.20 (m, 1H), 6.82-6.78 (m, 3H), 6.69-6.67 (m, 1H), 5.85 (d, J = 1.0 Hz, 2H); <sup>13</sup>C NMR (100 MHz, CDCl<sub>3</sub>) δ 161.3, 147.8, 147.5, 139.8, 128.7, 128.5, 127.9, 127.3, 127.2, 126.7, 121.1, 108.1, 107.7, 101.2, 81.2; Anal Calcd for C<sub>16</sub>H<sub>12</sub>Cl<sub>3</sub>NO<sub>3</sub>: C, 51.57; H, 3.25; N, 3.76; Found: C, 51.56; H, 3.21; N, 3.57.

## General Experimental Procedure for the Isatin Alkylation

Isatin (0.7 mmol) was taken in a culture tube and solvent (either THF or ethyl acetate, 0.2 M) was added. The imidate (2.1 mmol) was added followed by freshly distilled BF<sub>3</sub>•OEt<sub>2</sub> (0.07 mmol). The reaction mixture was stirred for 20 h at rt under a positive pressure of argon. The solvent was then evaporated, and the residue was loaded onto a silica gel column for purification using the listed solvent.

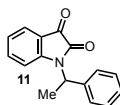

**1-(1-Phenylethyl)-2,3-indolinedione 11.** Purified by silica chromatography (35% EA/hexanes) to give product as yellow solid. Yield: 91%; TLC R<sub>f</sub> = 0.32 (35% EA/65% hexanes); <sup>1</sup>H NMR (400 MHz, CDCl<sub>3</sub>) δ 7.60 (d, J = 7.2 Hz, 1H), 7.41-7.29 (m, 6H), 7.03 (t, J = 7.5 Hz, 1H), 6.54 (d, J = 7.6 Hz, 1H), 5.79 (q, J = 7.2 Hz, 1H), 1.87 (d, J = 7.2 Hz, 3H); <sup>13</sup>C NMR (100 MHz, CDCl<sub>3</sub>) δ 183.5, 158.2, 149.8, 138.1, 137.9, 129.0, 128.0, 126.6, 125.4, 123.5, 118, 112.5, 50.0, 16.3. Chiral HPLC (Chiracel-OD), n-hexane:i-PrOH = 50:50, 1 mL/min, t<sub>R</sub> = 5.6 and 6.1 min. This compound has been reported previously.<sup>8</sup>

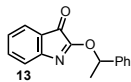

**2-(1-Phenylethoxy)-3-indolone 13.** Purified by silica chromatography (20% EA/hexanes) to give product as orange oil. Yield: 46%; TLC  $R_f = 0.76$  (30% EA/70% hexanes); IR (ATR) 3555, 3062, 2979, 1741, 1591, 1450, 1263, 754  $\text{cm}^{-1}$ ;  $^1\text{H NMR}$  (400 MHz,  $\text{CDCl}_3$ )  $\delta$  7.45-7.41 (m, 4H), 7.39-7.31 (m, 3H), 7.10-7.04 (m, 2H), 6.15 (q,  $J = 6.5$  Hz, 1H), 1.75 (d,  $J = 6.6$  Hz, 3H);  $^{13}\text{C NMR}$  (100 MHz,  $\text{CDCl}_3$ )  $\delta$  186.6, 164.8, 160, 140.4, 137.7, 128.6, 128.3, 126.4, 125.7, 125, 122.5, 120.2, 78.5, 22.1. Chiral HPLC (Chiracel-OD), n-hexane:i-PrOH = 60:40, 1 mL/min,  $t_R = 4.3$  and 4.5 min. HRMS (ESI+) calcd for  $\text{C}_{16}\text{H}_{13}\text{NO}_2\text{H}^+$   $[\text{M} + \text{H}]^+$ : 252.1025, found: 252.1027.

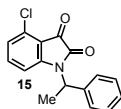

**4-Chloro-1-(1-phenylethyl)-2,3-indolinedione 15.** Purified by silica chromatography (30% EA/hexanes) to give product as orange solid. Yield: 71%; mp = 132-135  $^\circ\text{C}$ ; TLC  $R_f = 0.44$  (30% EA/70% hexanes); IR (ATR) 3452, 3084, 2986, 1725, 1596, 1443, 779  $\text{cm}^{-1}$ ;  $^1\text{H NMR}$  (400 MHz,  $\text{CDCl}_3$ )  $\delta$  7.38-7.37 (m, 4H), 7.33-7.30 (m, 1H), 7.24-7.22 (m, 1H), 6.97 (d,  $J = 8.2$  Hz, 1H), 6.45 (d,  $J = 8.0$  Hz, 2H), 5.80 (q,  $J = 7.2$  Hz, 1H), 1.86 (d,  $J = 7.2$  Hz, 3H);  $^{13}\text{C NMR}$  (100 MHz,  $\text{CDCl}_3$ )  $\delta$  180.3, 157.3, 150.9, 138, 137.8, 133.9, 129, 128.1, 126.6, 125, 115.1, 110.6, 50.3, 16.3; Anal. Calcd for  $\text{C}_{16}\text{H}_{12}\text{ClNO}_2$ : C, 67.26; H, 4.23; N, 4.90. Found: C, 67.27; H, 4.22; N, 4.83; .

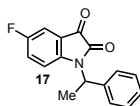

**5-Fluoro-1-(1-phenylethyl)-2,3-indolinedione 17.** Purified by silica chromatography (30% EA/hexanes) to give product as red oil. Yield: 65%; TLC  $R_f = 0.43$  (30% EA/70% hexanes); IR (ATR) 3462, 3060, 2983, 1726, 1603, 1480,  $\text{cm}^{-1}$ ;  $^1\text{H NMR}$  (400 MHz,  $\text{CDCl}_3$ )  $\delta$  7.38-7.31 (m, 5H), 6.48 (dd,  $J = 6.6, 2.8$  Hz, 1H), 7.05 (dt,  $J = 8.7, 2.7$  Hz, 1H), 6.49 (dd,  $J = 8.7, 3.6$  Hz, 1H), 5.79 (q,  $J = 7.4$  Hz, 1H), 1.85 (d,  $J = 7.2$  Hz, 3H);  $^{13}\text{C NMR}$  (100 MHz,  $\text{CDCl}_3$ )  $\delta$  183.0 (d,  $J = 2.2$  Hz), 159.0 (d,  $J = 244.7$  Hz), 158.0 (d,  $J = 1.9$  Hz), 145.8 (d,  $J = 2.5$  Hz), 137.8, 129.0, 128.1, 126.6, 124.2 (d,  $J = 23.7$  Hz), 118.8 (d,  $J = 6.9$  Hz), 113.7 (d,  $J = 6.9$  Hz), 112.3 (d,  $J = 24.0$  Hz), 50.1, 16.2; Anal. Calcd for  $\text{C}_{16}\text{H}_{12}\text{FNO}_2$ : C, 71.37; H, 4.49; N, 5.20. Found: C, 71.46; H, 4.43; N, 5.20.

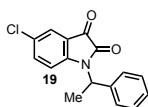

**5-Chloro-1-(1-phenylethyl)-2,3-indolinedione 19.** Purified by silica chromatography (30% EA/hexanes) to give product as bright orange waxy solid. Yield: 82%; mp = 89-94  $^\circ\text{C}$ ; TLC  $R_f = 0.43$  (30% EA/70% hexanes); IR (ATR) 3308, 3060, 2984, 1729, 1612, 1445, 738  $\text{cm}^{-1}$ ;  $^1\text{H NMR}$  (400 MHz,  $\text{CDCl}_3$ )  $\delta$  7.55 (d,  $J = 2.4$  Hz, 1H), 7.39-7.28 (m, 6H), 6.48 (d,  $J = 8.5$  Hz, 1H), 5.79 (q,  $J = 7.2$  Hz, 1H), 1.85 (d,  $J = 7.2$  Hz, 3H);  $^{13}\text{C NMR}$  (100 MHz,  $\text{CDCl}_3$ )  $\delta$  182.5, 157.6, 148, 137.7, 137.2, 129.4, 129.1, 128.2, 126.6, 125.3, 118.9, 113.7, 50.2, 16.2; Anal. Calcd for  $\text{C}_{16}\text{H}_{12}\text{ClNO}_2$ : C, 67.26; H, 4.23; N, 4.90. Found: C, 67.10; H, 4.20; N, 4.93.

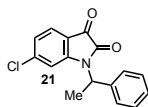

**6-Chloro-1-(1-phenylethyl)-2,3-indolinedione 21.** Purified by silica chromatography (25% EA/hexanes) to give product as an orange solid. Yield: 36%; mp = 118-122  $^\circ\text{C}$ ; TLC  $R_f = 0.72$  (30% EA/70% hexanes); IR (ATR) 3457, 3075, 2976, 1737, 1602, 1446, 700  $\text{cm}^{-1}$ ;  $^1\text{H NMR}$  (400 MHz,  $\text{CDCl}_3$ )  $\delta$  7.51 (d,  $J = 8.0$  Hz, 1H), 7.39-7.38 (m, 4H), 7.34-7.31 (m, 1H), 7.00 (dd,  $J = 8.0, 1.6$  Hz, 1H), 6.56 (d,  $J = 1.6$  Hz, 1H), 5.73 (q,  $J = 7.2$

Hz, 1H), 1.86 (d,  $J = 7.2$  Hz, 3H);  $^{13}\text{C}$  NMR (100 MHz,  $\text{CDCl}_3$ )  $\delta$  182, 158.1, 150.8, 144.2, 137.7, 129.1, 128.2, 126.6, 126.3, 123.7, 116.3, 113, 50.4, 16.3; Anal. Calcd for  $\text{C}_{16}\text{H}_{12}\text{ClNO}_2$ : C, 67.26; H, 4.23; N, 4.90. Found: C, 67.23; H, 4.23; N, 4.96.

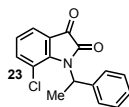

**7-Chloro-1-(1-phenylethyl)-2,3-indolinedione 23.** Purified by silica chromatography (25% EA/hexanes) to give product as dark orange oil. Yield: 21%; TLC  $R_f = 0.62$  (30% EA/70% hexanes); IR (ATR) 3476, 3346, 3063, 2980, 1745, 1581, 758  $\text{cm}^{-1}$ ;  $^1\text{H}$  NMR (400 MHz,  $\text{CDCl}_3$ )  $\delta$  7.51 (d,  $J = 7.3$  Hz, 2H), 7.42-7.31 (m, 5H), 7.00 (t,  $J = 7.6$  Hz, 1H), 6.28 (q,  $J = 6.5$  Hz, 1H), 1.77 (d,  $J = 6.6$  Hz, 3H);  $^{13}\text{C}$  NMR (100 MHz,  $\text{CDCl}_3$ )  $\delta$  185.8, 164.9, 156.4, 140, 138, 128.6, 128.5, 126.7, 126.6, 125.4, 124.4, 123.1, 79.1, 21.8; Anal. Calcd for  $\text{C}_{16}\text{H}_{12}\text{ClNO}_2$ : C, 67.26; H, 4.23; N, 4.90. Found: C, 67.25; H, 4.26; N, 4.84.

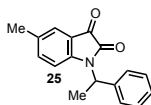

**5-Methyl-1-(1-phenylethyl)-2,3-indolinedione 25.** Purified by silica chromatography (40% EA/hexanes) to give product as red oil. Yield: 74%; TLC  $R_f = 0.56$  (40% EA/60% hexanes); IR (ATR) 3437, 3052, 2983, 1728, 1621, 1488  $\text{cm}^{-1}$ ;  $^1\text{H}$  NMR (400 MHz,  $\text{CDCl}_3$ )  $\delta$  7.41-7.30 (m, 6H), 7.14 (d,  $J = 8.1$  Hz, 1H), 6.43 (d,  $J = 8.1$  Hz, 1H), 5.77 (q,  $J = 7.2$  Hz, 1H), 2.26 (s, 3H), 1.85 (d,  $J = 7.2$  Hz, 3H);  $^{13}\text{C}$  NMR (100 MHz,  $\text{CDCl}_3$ )  $\delta$  183.8, 158.3, 147.6, 138.3, 138.2, 133.3, 128.9, 127.8, 126.6, 125.7, 118.1, 112.3, 49.9, 20.5, 16.3; Anal. Calcd for  $\text{C}_{17}\text{H}_{15}\text{NO}_2$ : C, 76.96; H, 5.70; N, 5.28. Found: C, 76.99; H, 5.70; N, 5.21.

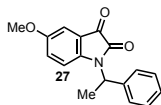

**5-Methoxy-1-(1-phenylethyl)-2,3-indolinedione 27.** Purified by silica chromatography 10% EA/hexanes to give product as dark red solid. Yield: 71%; mp = 76-80  $^\circ\text{C}$ ; TLC  $R_f = 0.32$  (30% EA/70% hexanes); IR (ATR) 3365, 3025, 2963, 1722, 1625, 1484, 1272  $\text{cm}^{-1}$ ;  $^1\text{H}$  NMR (400 MHz,  $\text{CDCl}_3$ )  $\delta$  7.35-7.29 (m, 4H), 7.24-7.23 (m, 1H), 7.06 (d,  $J = 2.1$  Hz, 1H), 6.84 (dd,  $J = 8.7, 2.6$  Hz, 1H), 6.41 (d,  $J = 8.7$  Hz, 1H), 5.70 (q,  $J = 7.1$  Hz, 1H), 3.68 (s, 1H), 1.79 (d,  $J = 7.2$  Hz, 3H);  $^{13}\text{C}$  NMR (100 MHz,  $\text{CDCl}_3$ )  $\delta$  183.9, 158.3, 156.2, 143.6, 138.2, 128.9, 127.9, 126.6, 124.2, 118.5, 113.5, 109.6, 55.9, 49.9, 16.3; Anal. Calcd for  $\text{C}_{17}\text{H}_{15}\text{NO}_3$ : C, 72.58; H, 5.37; N, 4.98. Found: C, 72.58; H, 5.33; N, 4.95.

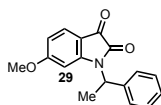

**6-Methoxy-1-(1-phenylethyl)-2,3-indolinedione 29.** Purified by silica chromatography 10% EA/hexanes to give product as yellow solid. Yield: 67%; mp = 126-130  $^\circ\text{C}$ ; TLC  $R_f = 0.47$  (30% EA/70% hexanes); IR (ATR) 3450, 3030, 2976, 1720, 1607, 1447, 1222  $\text{cm}^{-1}$ ;  $^1\text{H}$  NMR (400 MHz,  $\text{CDCl}_3$ )  $\delta$  7.57 (d,  $J = 8.4$  Hz, 1H), 7.40-7.35 (m, 4H), 7.32-7.30 (m, 1H), 6.47 (dd,  $J = 8.4, 2$  Hz, 1H), 6.01 (d,  $J = 1.9$  Hz, 1H), 5.76 (q,  $J = 7.2$  Hz, 1H), 3.71 (s, 1H), 1.85 (d,  $J = 7.2$  Hz, 3H);  $^{13}\text{C}$  NMR (100 MHz,  $\text{CDCl}_3$ )  $\delta$  180.8, 167.6, 159.6, 152.2, 138.3, 128.9, 128, 127.9, 126.7, 111.7, 107.7, 99.6, 55.8, 49.9, 16.4; Anal. Calcd for  $\text{C}_{17}\text{H}_{15}\text{NO}_3$ : C, 72.58; H, 5.37; N, 4.98. Found: C, 72.64; H, 5.34; N, 4.96.

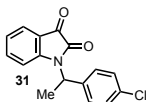

**1-[1-(*p*-Chlorophenyl)ethyl]-2,3-indolinedione 31.** Purified by silica chromatography 10% EA/hexanes to give product as orange solid. Yield: 65%; mp = 102-105  $^\circ\text{C}$ ; TLC  $R_f = 0.47$  (30% EA/70% hexanes); IR (ATR)

3457, 3035, 2980, 1740, 1723, 1606, 1463, 753  $\text{cm}^{-1}$ ;  $^1\text{H}$  NMR (400 MHz,  $\text{CDCl}_3$ )  $\delta$  7.51 (d,  $J = 7.4$  Hz, 1H), 7.39-7.31 (m, 5H), 7.06 (t,  $J = 7.6$  Hz, 1H), 6.53 (d,  $J = 8.4$  Hz, 1H), 5.74 (q,  $J = 7.2$  Hz, 1H), 1.85 (d,  $J = 7.2$  Hz, 3H);  $^{13}\text{C}$  NMR (100 MHz,  $\text{CDCl}_3$ )  $\delta$  183.2, 158.1, 149.5, 138, 136.7, 134, 129.1, 128, 125.6, 123.6, 118.1, 112, 49.5, 16.3; Anal. Calcd for  $\text{C}_{16}\text{H}_{12}\text{ClNO}_2$ : C, 67.26; H, 4.23; N, 4.90. Found: C, 67.53; H, 4.25; N, 4.86.

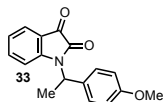

**1-[1-(*p*-Methoxyphenyl)ethyl]-2,3-indolinedione 33.** Purified by silica chromatography 10% EA/hexanes to give product as red oil. Yield: 85%; TLC  $R_f = 0.33$  (30% EA/70% hexanes); IR (ATR) 3454, 2935, 2835, 1729, 1607, 1512, 1248  $\text{cm}^{-1}$ ;  $^1\text{H}$  NMR (400 MHz,  $\text{CDCl}_3$ )  $\delta$  7.58 (d,  $J = 7.3$  Hz, 1H), 7.36-7.29 (m, 3H), 7.02 (t,  $J = 7.5$  Hz, 1H), 6.88 (d,  $J = 8.7$  Hz, 1H), 6.57 (d,  $J = 8.0$  Hz, 1H), 5.74 (q,  $J = 7.1$  Hz, 1H), 3.79 (s, 1H), 1.83 (d,  $J = 7.2$  Hz, 3H);  $^{13}\text{C}$  NMR (100 MHz,  $\text{CDCl}_3$ )  $\delta$  180.7, 159.2, 158.1, 149.9, 137.9, 130, 127.9, 125.3, 123.4, 118, 114.3, 112.5, 55.3, 49.6, 16.4; Anal. Calcd for  $\text{C}_{17}\text{H}_{15}\text{NO}_3$ : C, 72.58; H, 5.37; N, 4.98. Found: C, 72.62; H, 5.35; N, 5.02.

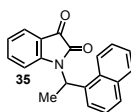

**1-[1-(1-Naphthyl)ethyl]-2,3-indolinedione 35.** Purified by silica chromatography 10% EA/hexanes to give product as yellow solid. Yield: 79%; mp = 56-61  $^{\circ}\text{C}$ ; TLC  $R_f = 0.44$  (30% EA/70% hexanes); IR (ATR) 3457, 3060, 2930, 1724, 1606, 1466  $\text{cm}^{-1}$ ;  $^1\text{H}$  NMR (400 MHz,  $\text{CDCl}_3$ )  $\delta$  7.96 (d,  $J = 9.2$  Hz, 1H), 7.87 (t,  $J = 8.8$  Hz, 2H), 7.82 (d,  $J = 7.2$  Hz, 1H), 7.57-7.46 (m, 4H), 7.22 (d,  $J = 7.7$  Hz, 1H), 6.92 (t,  $J = 7.5$  Hz, 1H), 6.69 (d,  $J = 8.1$  Hz, 1H), 6.40 (q,  $J = 7.2$  Hz, 1H), 2.01 (d,  $J = 7.1$  Hz, 3H);  $^{13}\text{C}$  NMR (100 MHz,  $\text{CDCl}_3$ )  $\delta$  183.3, 157.9, 150.2, 137.9, 133.9, 133.4, 131.4, 129.6, 129.1, 127.3, 126.2, 125.4, 125.2, 124.8, 123.3, 122.9, 118.1, 112.2, 47.9, 16.7; Anal. Calcd for  $\text{C}_{20}\text{H}_{15}\text{NO}_2$ : C, 79.72; H, 5.02; N, 4.65. Found: C, 79.67; H, 5.02; N, 4.59.

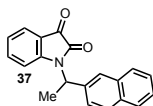

**1-[1-(2-Naphthyl)ethyl]-2,3-indolinedione 37.** Purified by silica chromatography 10% EA/hexanes to give product as yellow orange solid. Yield: 72%; mp = 142-145  $^{\circ}\text{C}$ ; TLC  $R_f = 0.44$  (30% EA/70% hexanes); IR (ATR) 3467, 3053, 2984, 1744, 1726, 1607, 1465  $\text{cm}^{-1}$ ;  $^1\text{H}$  NMR (400 MHz,  $\text{CDCl}_3$ )  $\delta$  7.88-7.81 (m, 4H), 7.60 (d,  $J = 7.3$  Hz, 1H), 7.54-7.48 (m, 2H), 7.44 (d,  $J = 8.5$  Hz, 1H), 7.29-7.27 (m, 1H), 7.00 (t,  $J = 7.5$  Hz, 1H), 6.57 (d,  $J = 8.0$  Hz, 1H), 5.95 (q,  $J = 6.7$  Hz, 1H), 1.96 (d,  $J = 7.1$  Hz, 3H);  $^{13}\text{C}$  NMR (100 MHz,  $\text{CDCl}_3$ )  $\delta$  183.5, 158.3, 149.8, 138, 135.7, 133.2, 132.8, 129, 128, 127.7, 126.6, 126.5, 125.4, 125.3, 124.7, 123.5, 118, 112.5, 50.2, 16.3; Anal. Calcd for  $\text{C}_{20}\text{H}_{15}\text{NO}_2$ : C, 79.72; H, 5.02; N, 4.65. Found: C, 79.67; H, 5.00; N, 4.71.

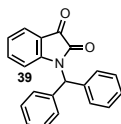

**1-Benzhydryl-2,3-indolinedione 39.** Purified by silica chromatography 10% EA/hexanes to give product as yellow solid. Yield: quant.; TLC  $R_f = 0.50$  (30% EA/70% hexanes);  $^1\text{H}$  NMR (400 MHz,  $\text{CDCl}_3$ )  $\delta$  7.62 (d,  $J = 7.4$  Hz, 1H), 7.37-7.30 (m, 11H), 7.04 (t,  $J = 7.4$  Hz, 1H), 6.98 (s, 1H), 6.50 (d,  $J = 8.1$  Hz, 1H);  $^{13}\text{C}$  NMR (100 MHz,  $\text{CDCl}_3$ )  $\delta$  183, 158.4, 150.6, 137.8, 136.6, 128.8, 128.4, 128.3, 125.4, 123.6, 118.2, 113.7, 58.9. This compound has been reported previously.<sup>9</sup>

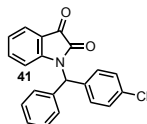

**1-[(*p*-Chlorophenyl)phenylmethyl]-2,3-indolinedione 41.** Purified by silica chromatography (30% EA/hexanes) to give product as yellow solid. Yield: 82%; mp = 162-165 °C; TLC  $R_f$  = 0.66 (40% EA/60% hexanes); IR (ATR) 3455, 3087, 3031, 2902, 1726, 1606, 1477, 750  $\text{cm}^{-1}$ ;  $^1\text{H}$  NMR (400 MHz,  $\text{CDCl}_3$ )  $\delta$  7.63 (d,  $J$  = 7.4 Hz, 1H), 7.38-7.27 (m, 9H), 7.25 (m, 1H), 7.06 (t,  $J$  = 7.6 Hz, 1H), 6.93 (s, 1H), 6.49 (d,  $J$  = 8.1 Hz, 1H);  $^{13}\text{C}$  NMR (100 MHz,  $\text{CDCl}_3$ )  $\delta$  182.8, 158.3, 150.2, 137.9, 136.1, 135.2, 134.3, 129.7, 129.1, 129, 128.5, 128.3, 125.5, 123.8, 118.2, 113.4, 58.4; Anal. Calcd for  $\text{C}_{21}\text{H}_{14}\text{ClNO}_2$ : C, 72.52; H, 4.06; N, 4.03. Found: C, 72.52; H, 4.06; N, 4.03;

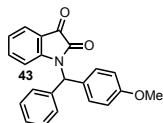

**1-[(*p*-Methoxyphenyl)phenylmethyl]-2,3-indolinedione 43.** Purified by silica chromatography 10% EA/hexanes to give product as dark yellow solid. Yield: 59%; mp = 51-55 °C; TLC  $R_f$  = 0.44 (30% EA/70% hexanes); IR (ATR) 3459, 3059, 2932, 1729, 1699, 1607, 1464, 1247  $\text{cm}^{-1}$ ;  $^1\text{H}$  NMR (400 MHz,  $\text{CDCl}_3$ )  $\delta$  7.61 (d,  $J$  = 7.4 Hz, 1H), 7.36-7.29 (m, 6H), 7.23 (d,  $J$  = 8.5 Hz, 1H), 7.04 (t,  $J$  = 7.5 Hz, 1H), 6.93 (s, 1H), 6.88 (d,  $J$  = 7.6 Hz, 2H), 6.51 (d,  $J$  = 8.1 Hz, 1H), 3.80 (s, 3H);  $^{13}\text{C}$  NMR (100 MHz,  $\text{CO}(\text{CD}_3)_2$ )  $\delta$  183.1, 159.5, 158.2, 150.8, 137.7, 137.5, 129.8, 129.2, 128.6, 128.2, 127.8, 124.4, 123.2, 118.5, 113.9, 113.2, 58.5, 54.7 (one signal in the  $^{13}\text{C}$  NMR was not resolved); Anal. Calcd for  $\text{C}_{22}\text{H}_{17}\text{NO}_3$ : C, 76.95; H, 4.99; N, 4.08. Found: C, 76.86; H, 5.01; N, 4.12.

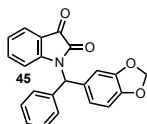

**1-[(2*H*-1,3-Benzodioxol-5-yl)phenylmethyl]-2,3-indolinedione 45.** Purified by silica chromatography (30% EA/hexanes) to give product as orange solid. Yield: 65%; mp = 72-78 °C; TLC  $R_f$  = 0.52 (30% EA/70% hexanes); IR (ATR) 3456, 3061, 2898, 1728, 1608, 1486, 1234,  $\text{cm}^{-1}$ ;  $^1\text{H}$  NMR (400 MHz,  $\text{CDCl}_3$ )  $\delta$  7.61 (d,  $J$  = 6.9 Hz, 1H), 7.36-7.30 (m, 6H), 7.05 (t,  $J$  = 7.4 Hz, 1H), 6.86 (s, 1H), 6.78-6.77 (m, 3H), 6.53 (d,  $J$  = 8.1 Hz, 1H), 5.96 (s, 2H);  $^{13}\text{C}$  NMR (100 MHz,  $\text{CDCl}_3$ )  $\delta$  183.1, 158.3, 150.6, 148.1, 147.6, 137.8, 136.7, 130.5, 128.8, 128.2, 128.1, 125.4, 123.6, 122.1, 118.2, 113.6, 108.9, 108.4, 101.5, 58.8; Anal. Calcd for  $\text{C}_{22}\text{H}_{15}\text{NO}_4$ : C, 73.94; H, 4.23; N, 3.92. Found: C, 73.91; H, 4.22; N, 3.97.

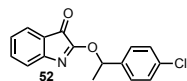

**2-[1-(*p*-Chlorophenyl)ethoxy]-3-indolone 52.** Purified by silica chromatography (20% EA/hexanes) to give product as orange oil. Yield: 59%; TLC  $R_f$  = 0.58 (25% EA/75% hexanes); IR (ATR) 3190, 3072, 2986, 1746, 1729, 1692, 1451, 1263, 1082  $\text{cm}^{-1}$ ;  $^1\text{H}$  NMR (400 MHz,  $\text{CDCl}_3$ )  $\delta$  7.45-7.40 (m, 4H), 7.34 (d,  $J$  = 8.4 Hz, 2H), 7.09-7.05 (m, 2H), 6.11 (q,  $J$  = 6.6 Hz, 1H), 1.72 (d,  $J$  = 6.6 Hz, 3H);  $^{13}\text{C}$  NMR (100 MHz,  $\text{CDCl}_3$ )  $\delta$  186.4, 164.6, 159.8, 139, 137.7, 134.1, 128.8, 127.8, 125.8, 125, 122.5, 120.3, 77.6, 22.1; HRMS (ESI+) calcd for  $\text{C}_{16}\text{H}_{12}\text{ClNO}_2\text{H}^+$   $[\text{M} + \text{H}]^+$ : 286.0635, found: 286.0626.

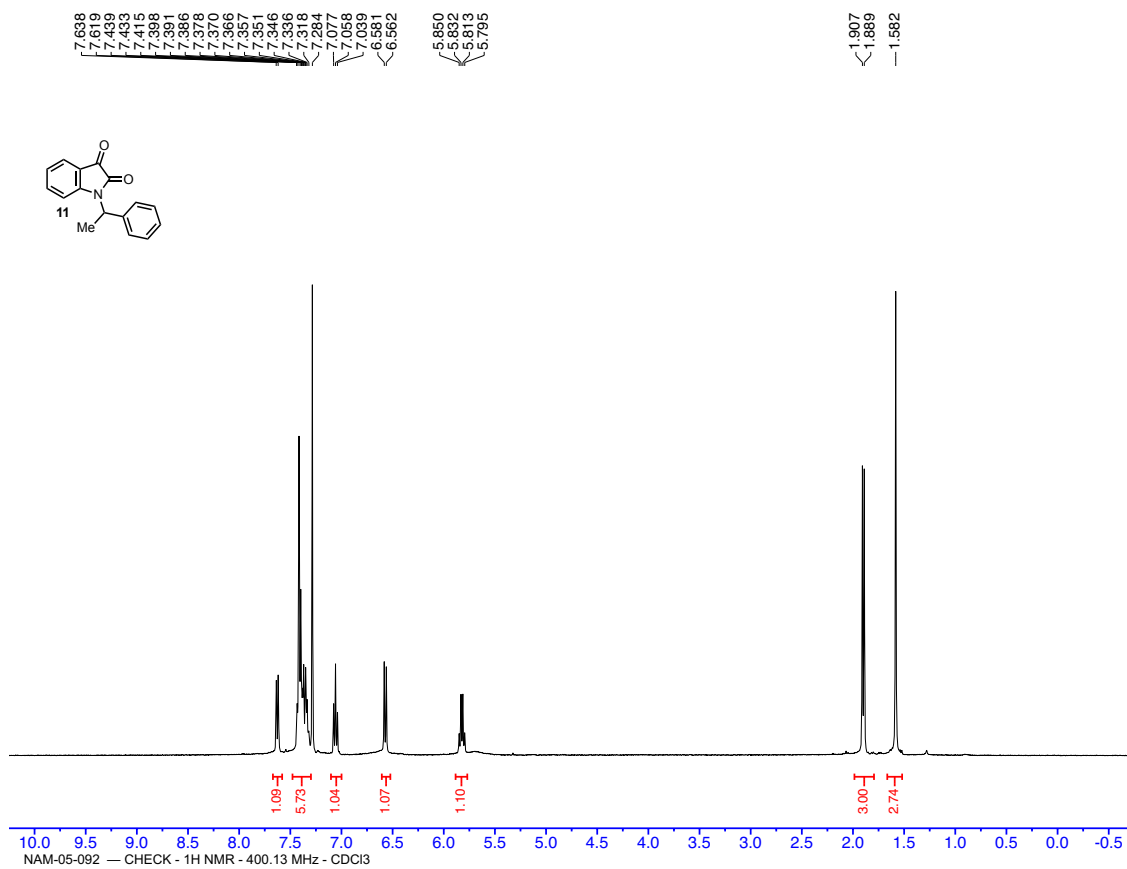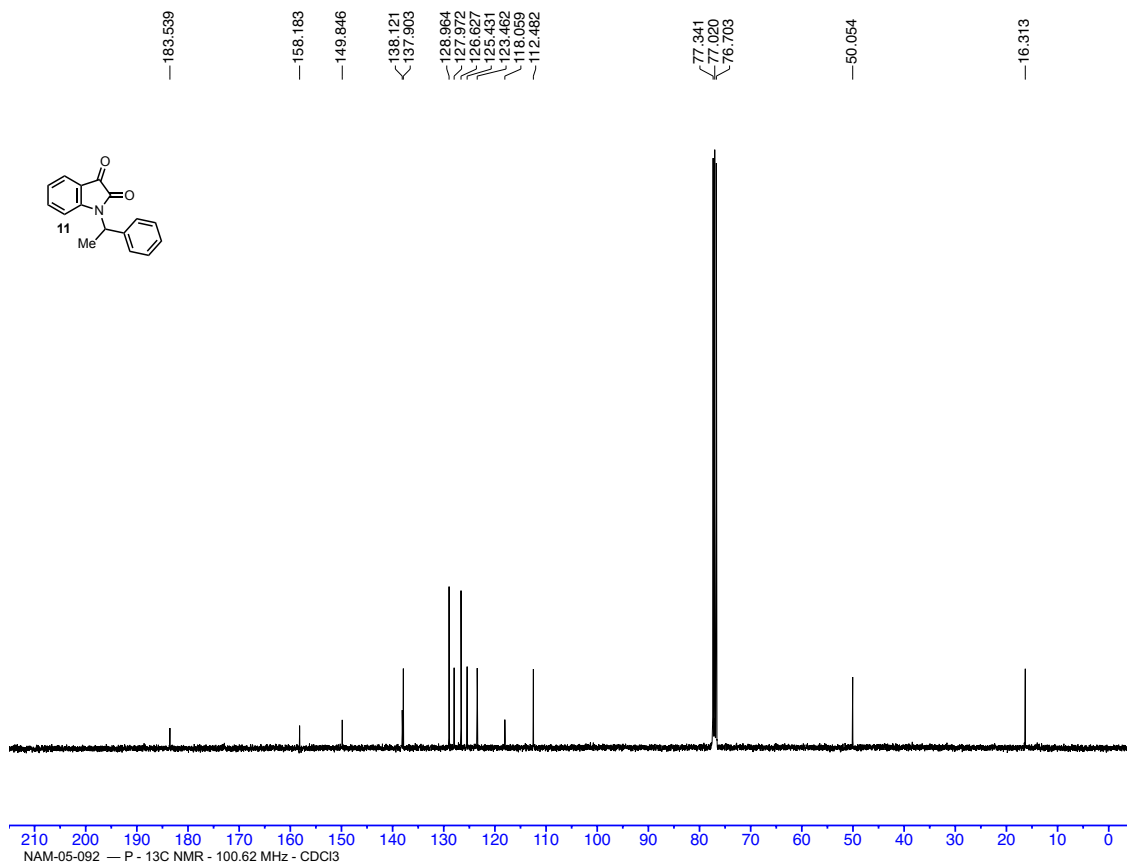

7.510  
7.506  
7.493  
7.489  
7.478  
7.474  
7.468  
7.464  
7.458  
7.455  
7.449  
7.446  
7.439  
7.422  
7.418  
7.401  
7.396  
7.385  
7.381  
7.364  
7.360  
7.343  
7.285  
7.163  
7.083  
6.187  
6.170  
6.154

1.781  
1.764  
1.602

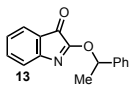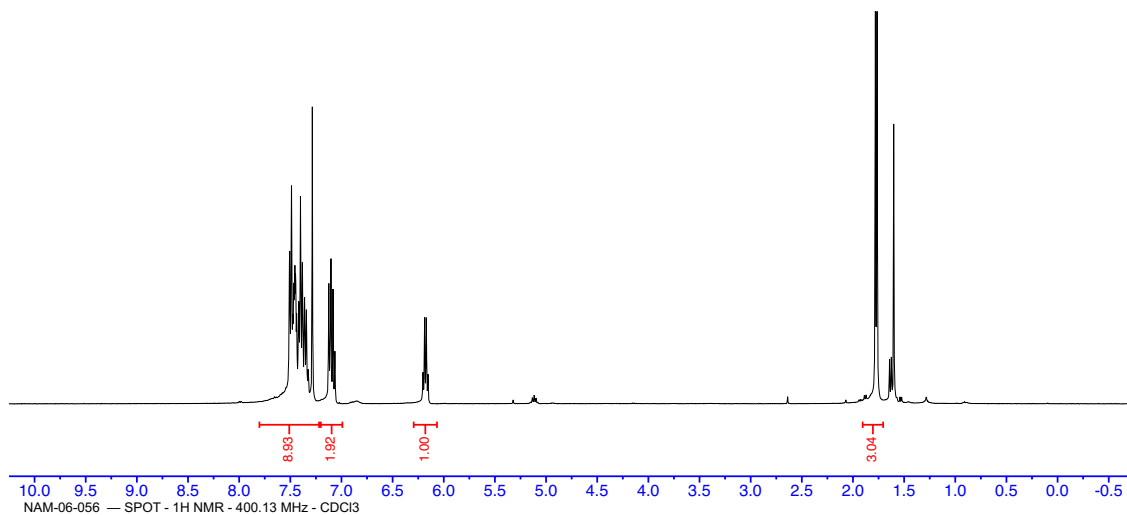

186.579

164.800

160.046

140.451

137.680

128.989

128.584

128.336

126.371

123.666

122.514

120.258

77.338

77.020

76.703

22.128

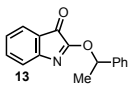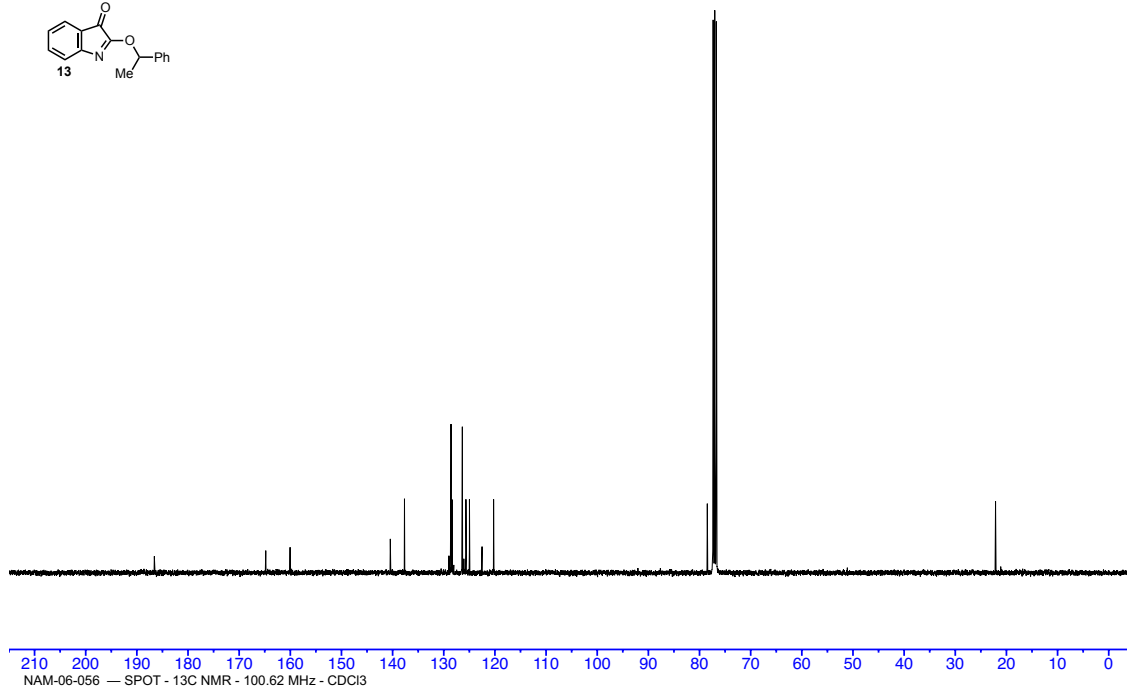



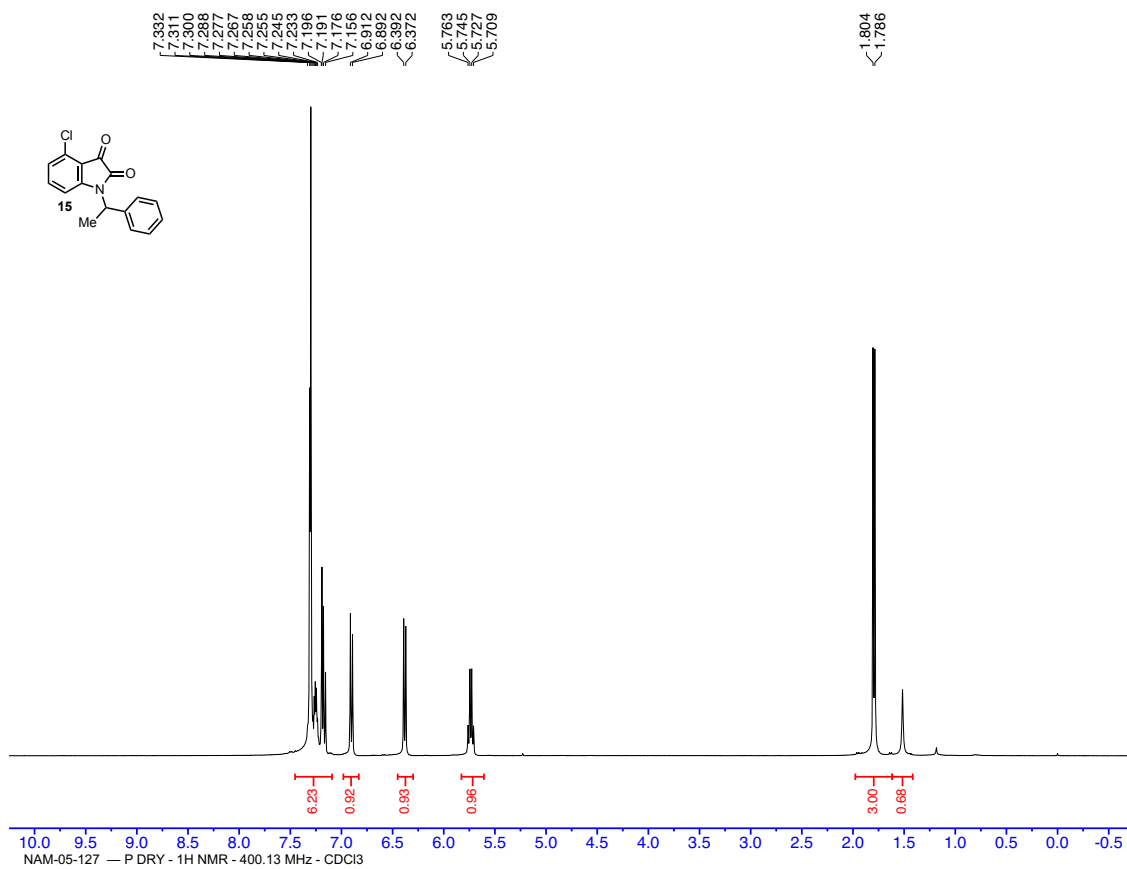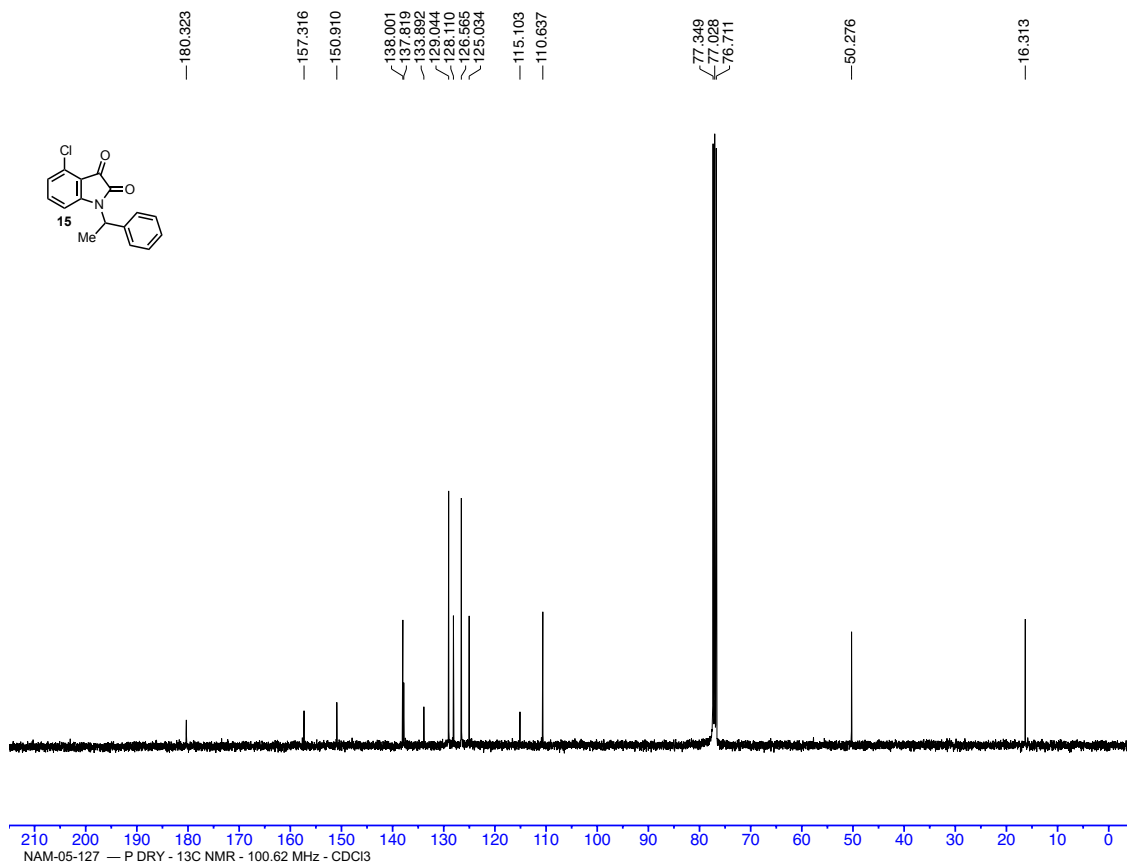

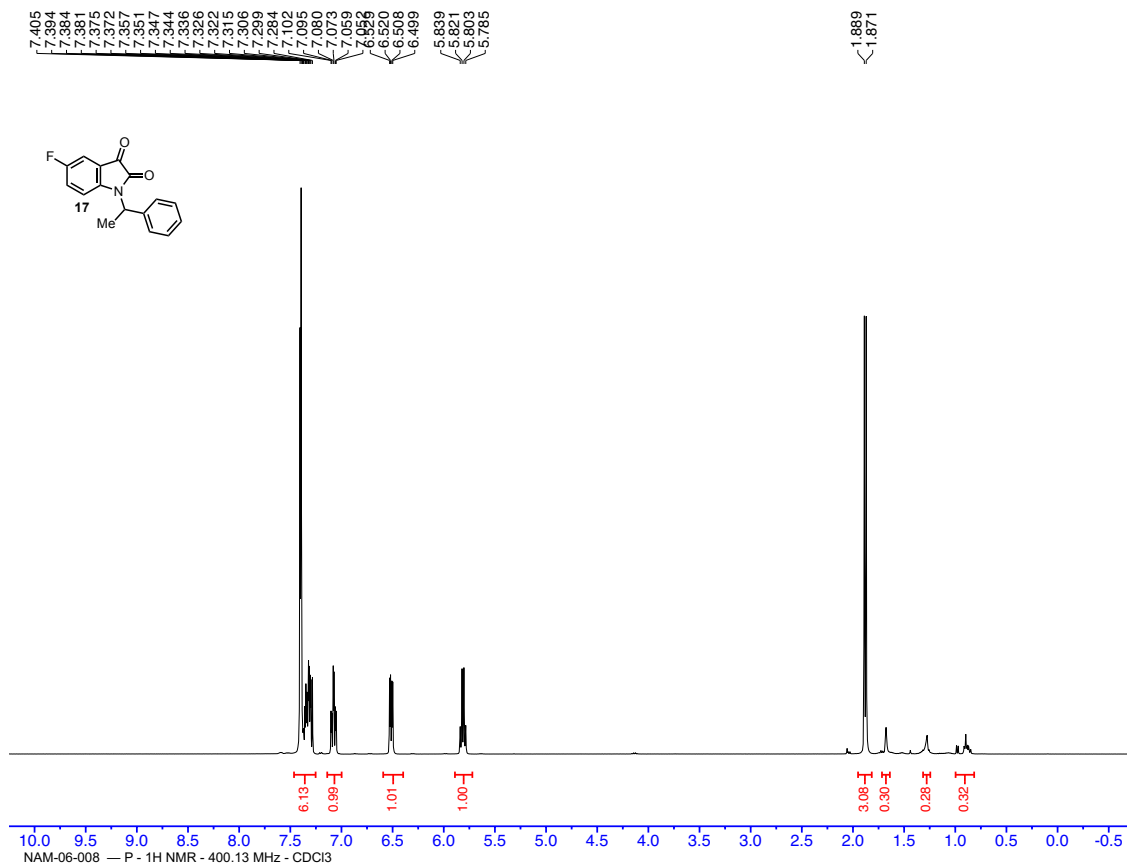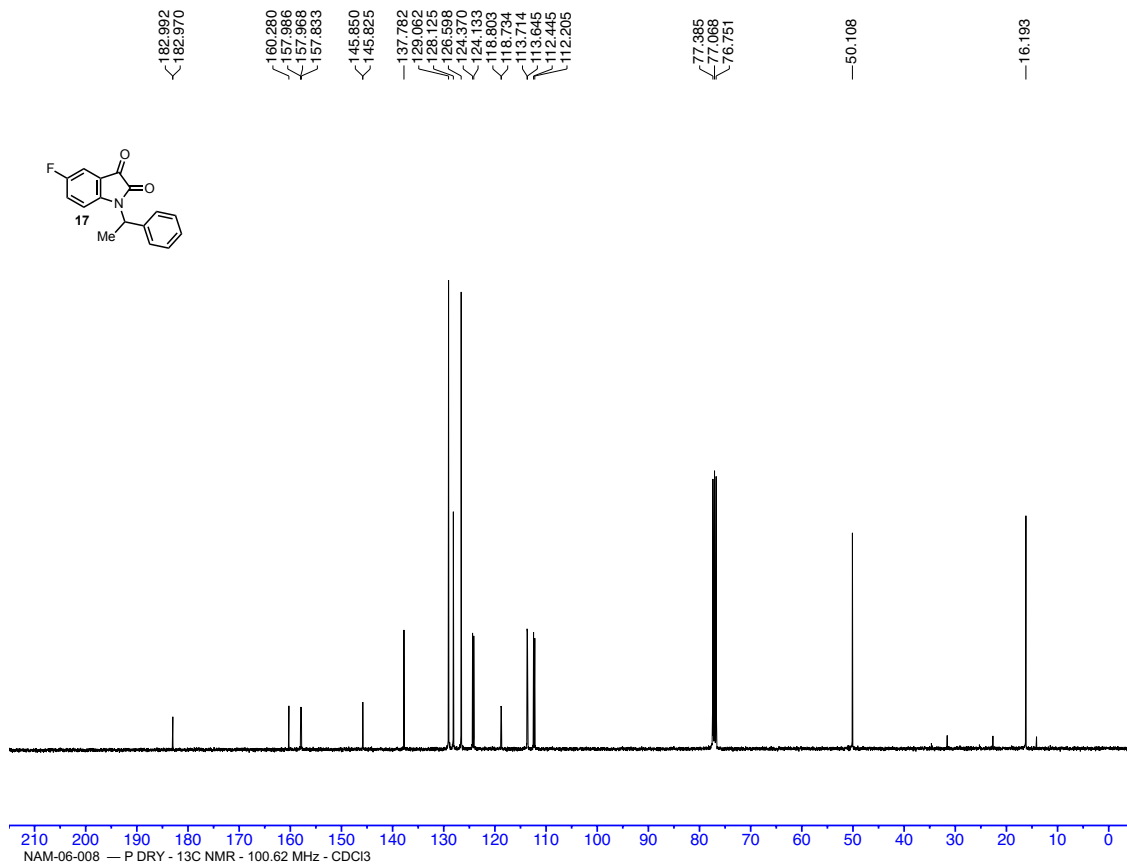

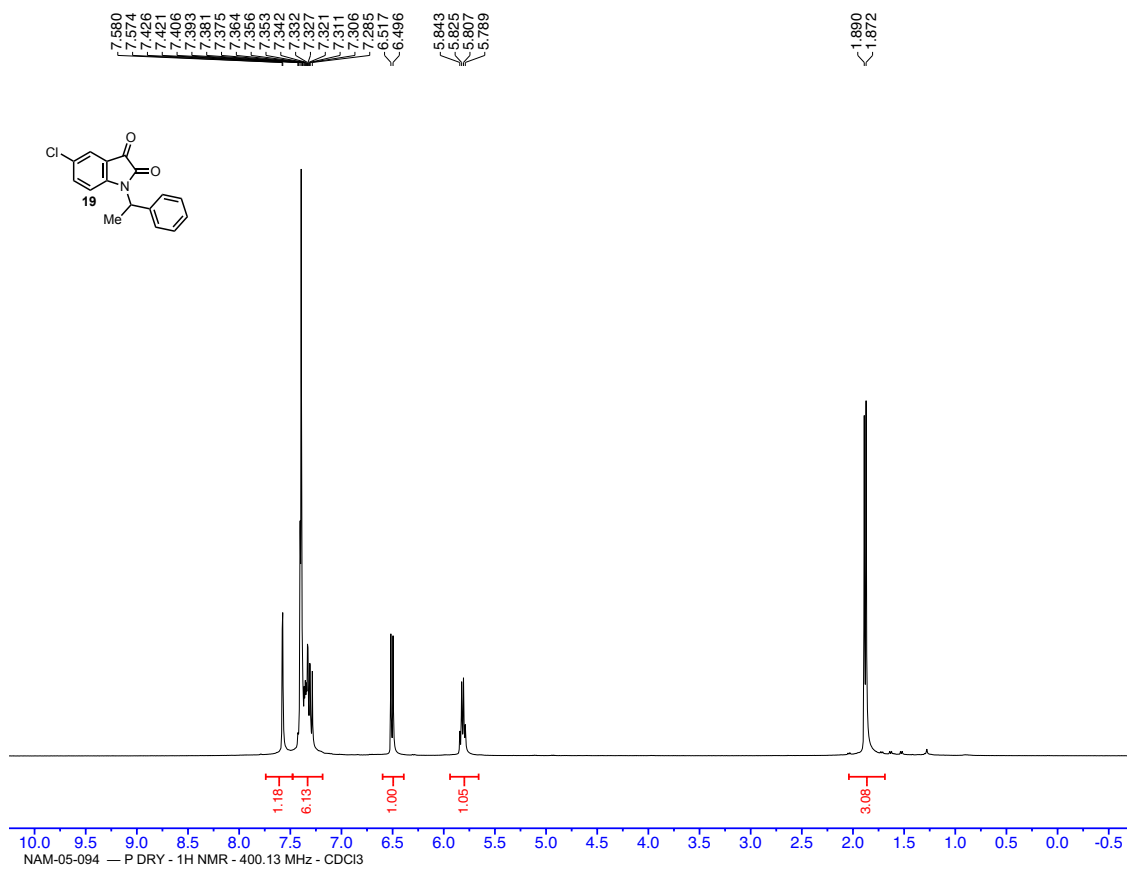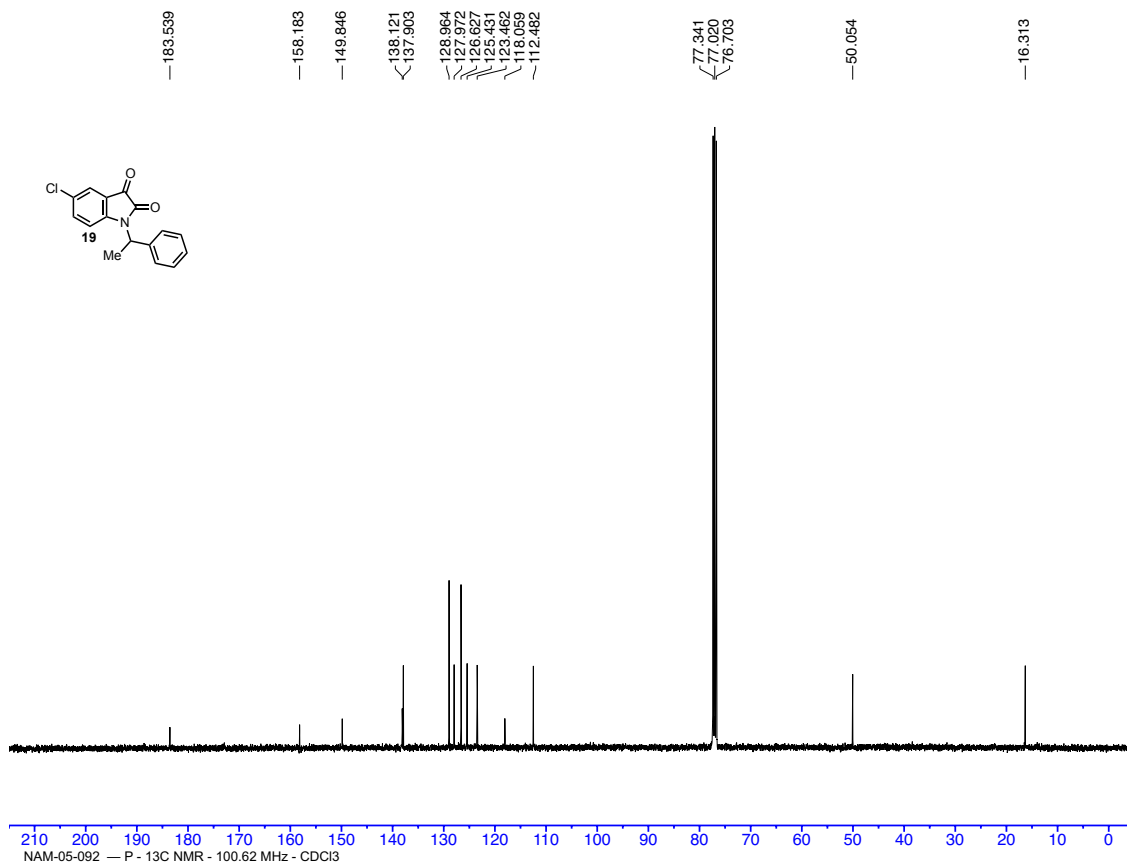

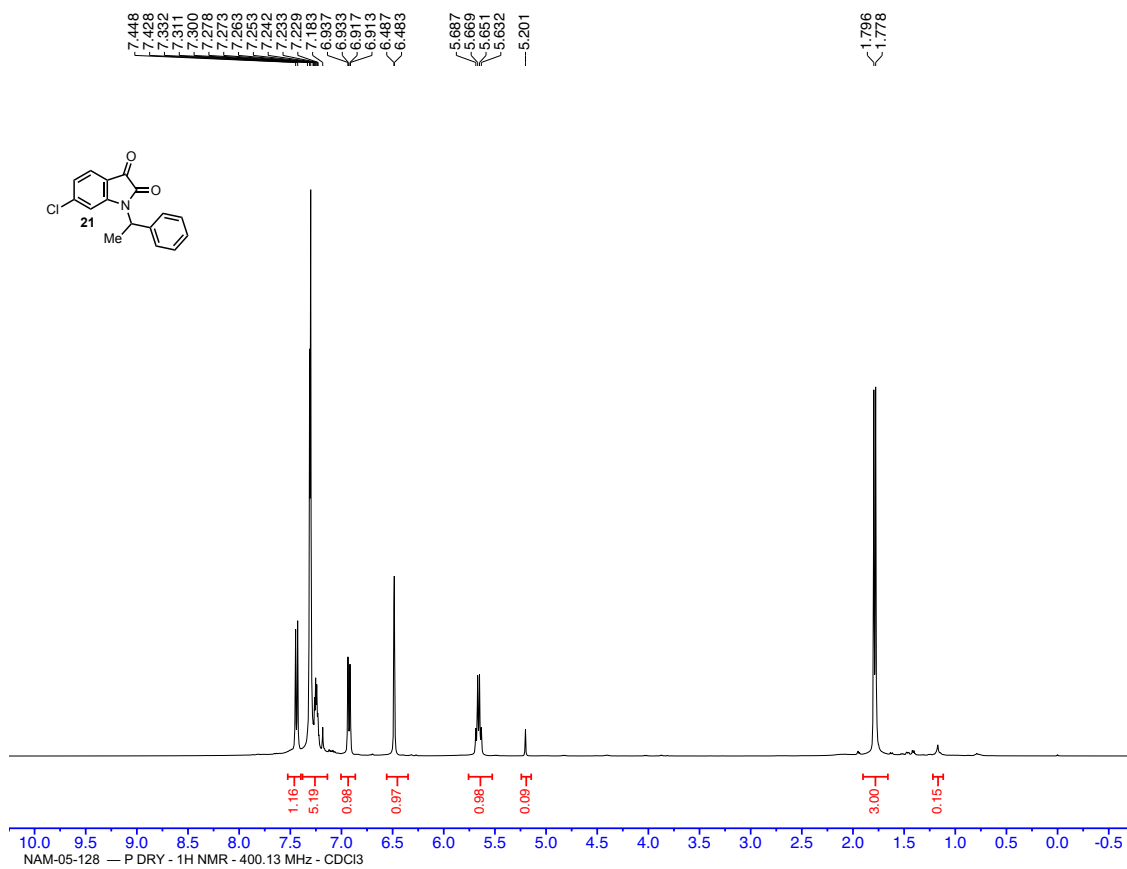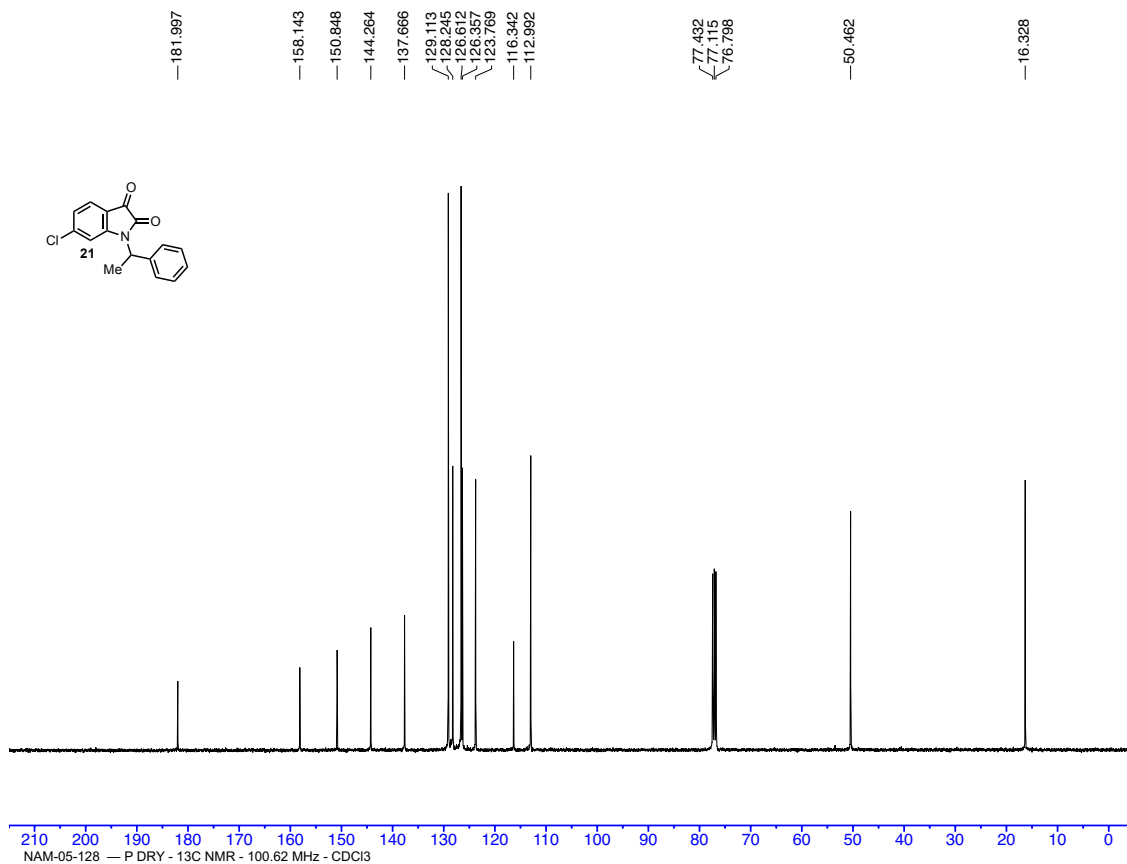

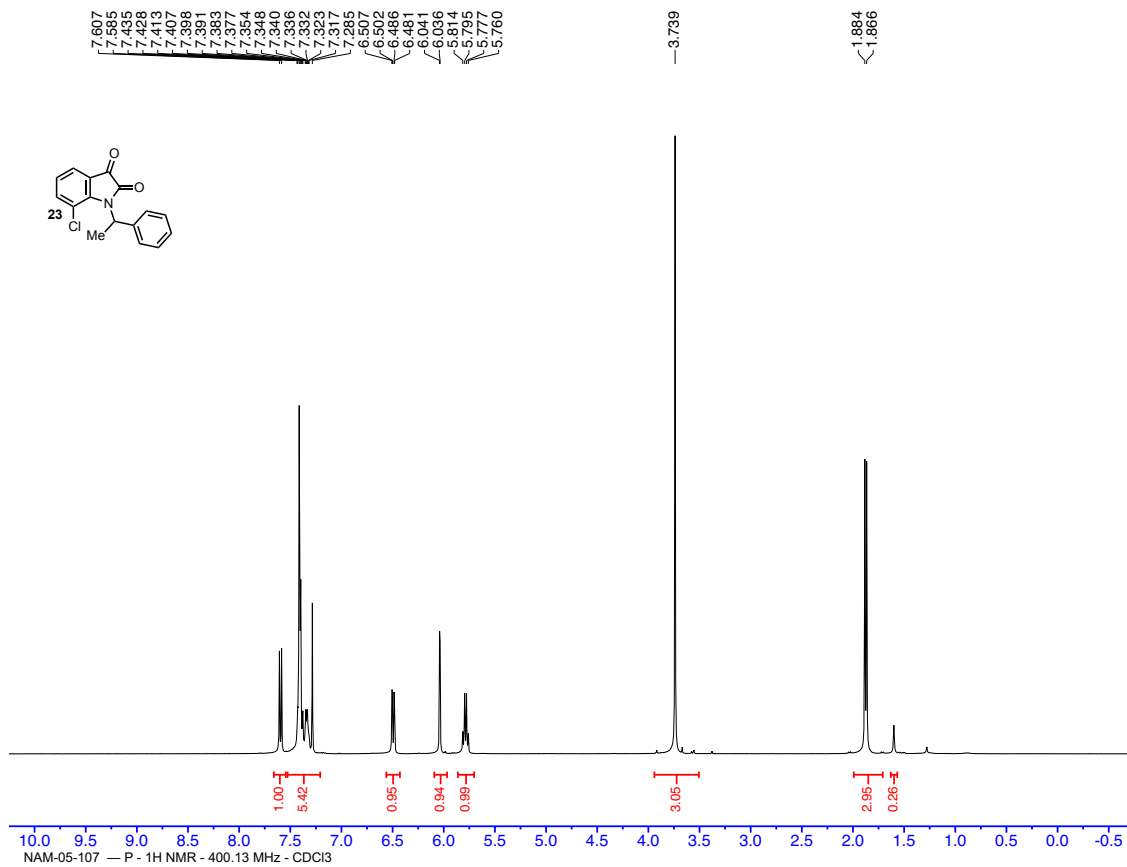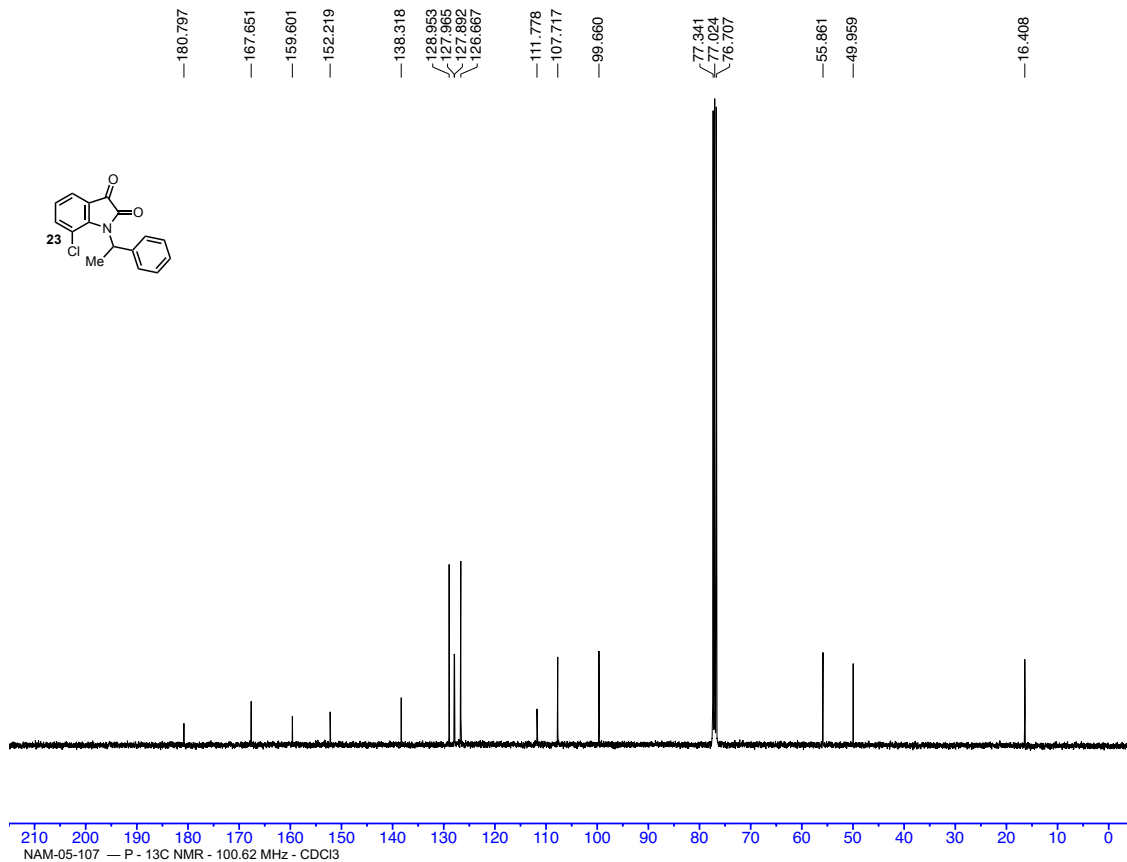

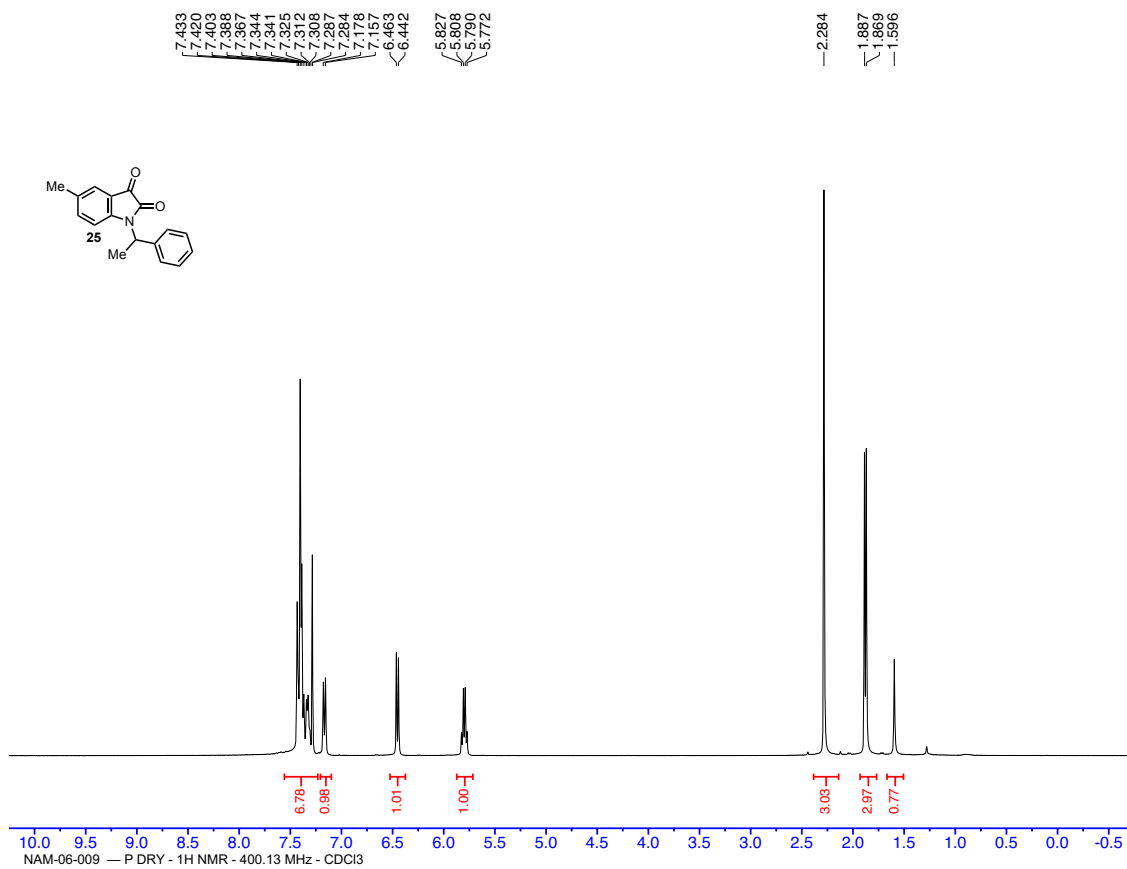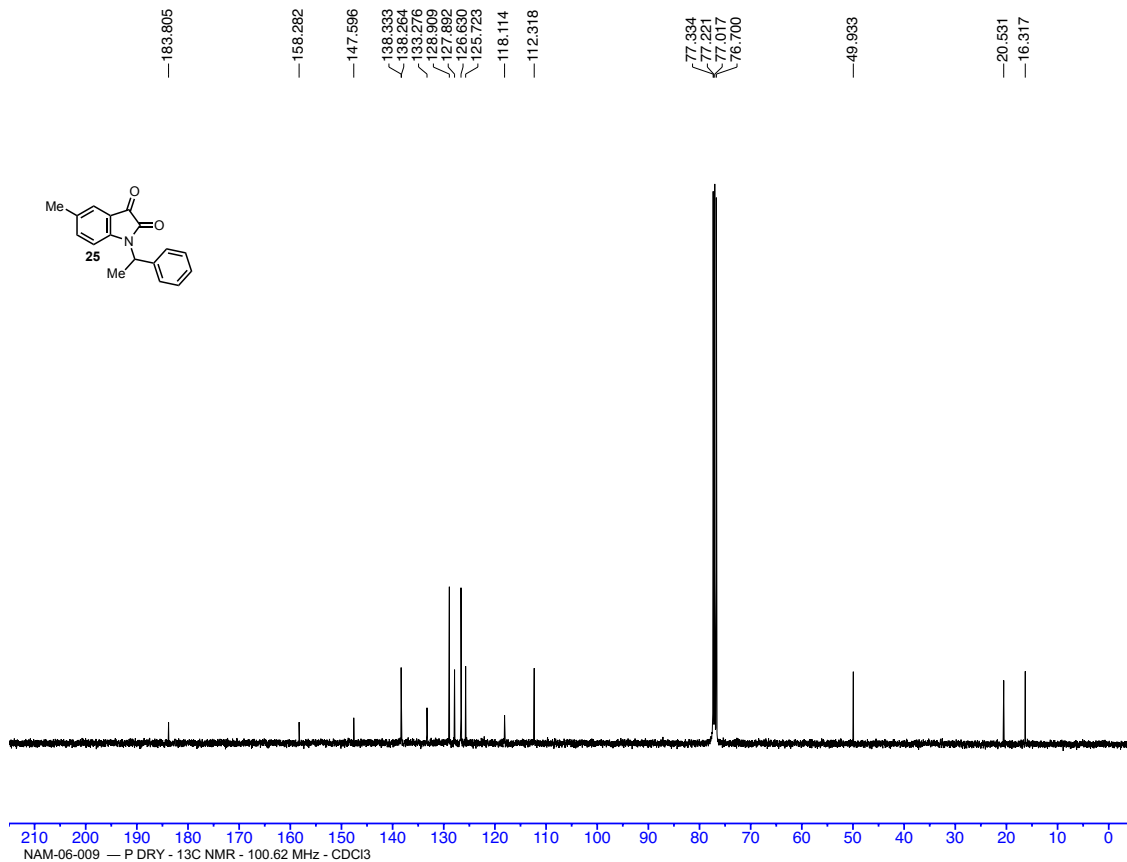

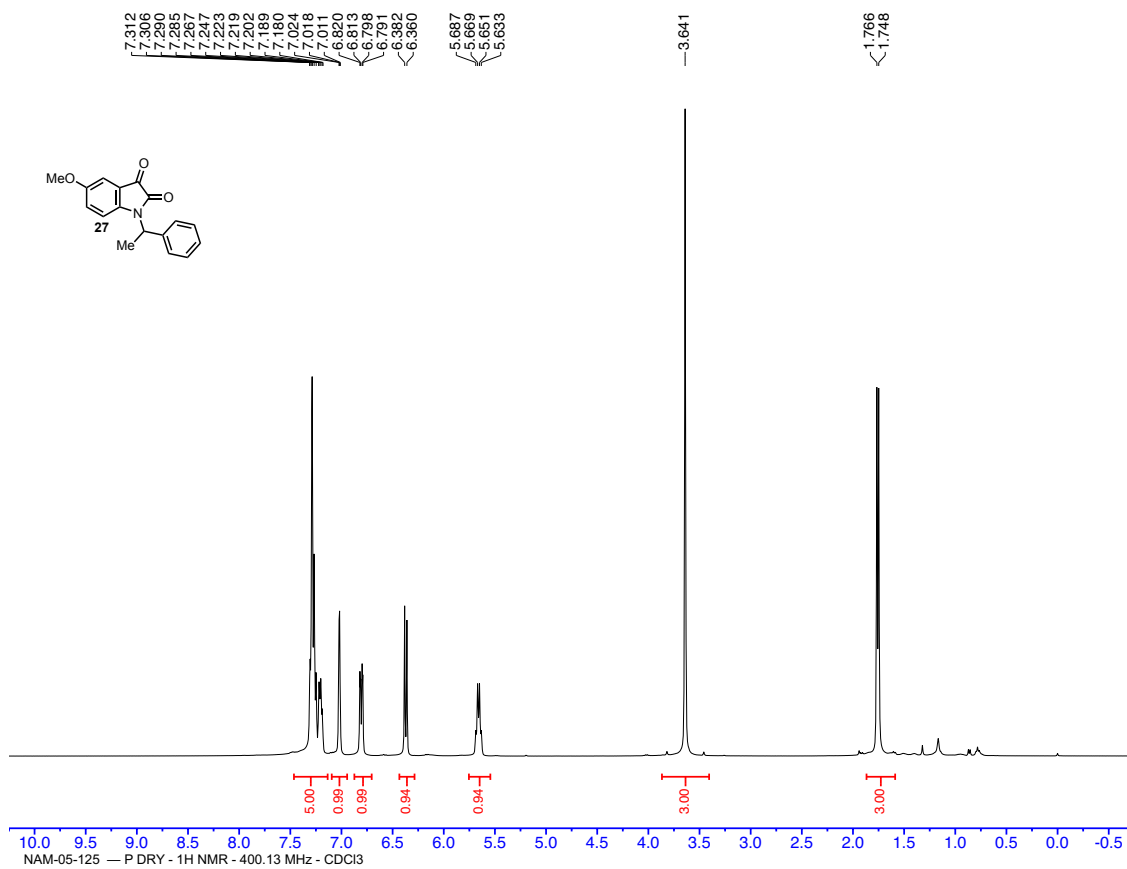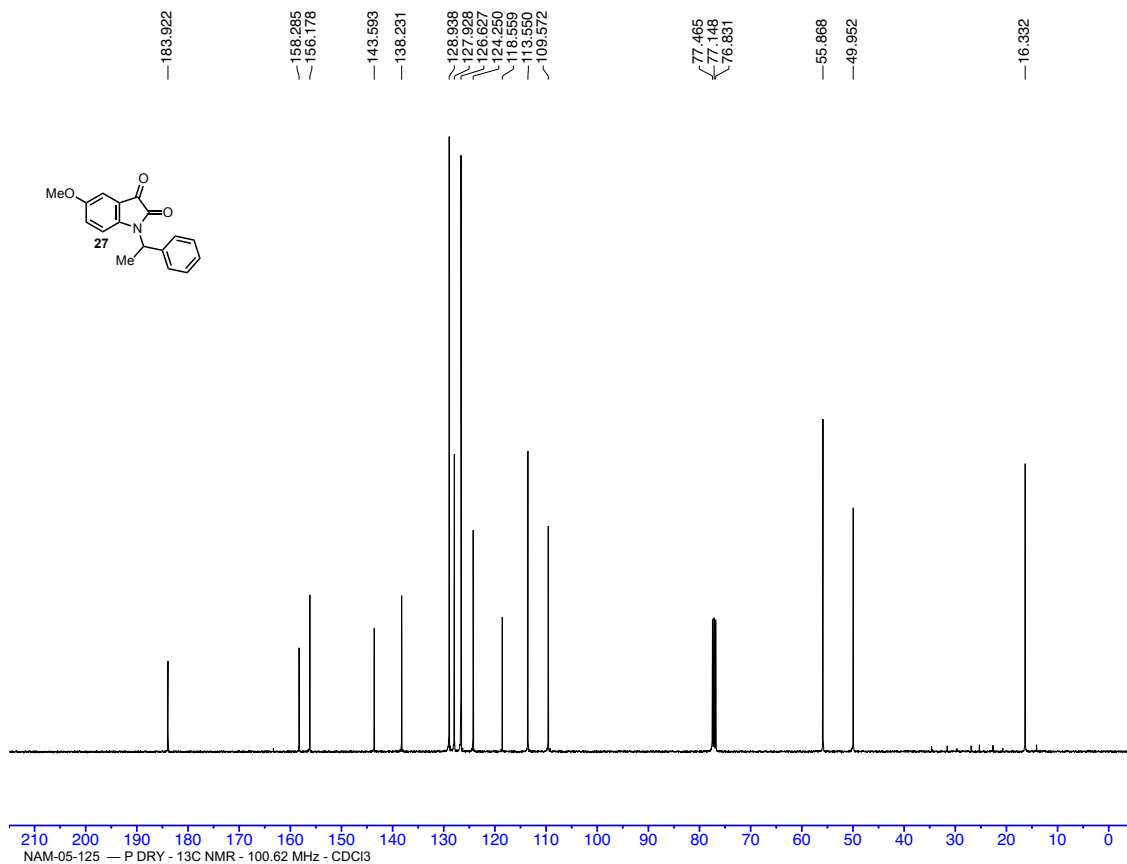

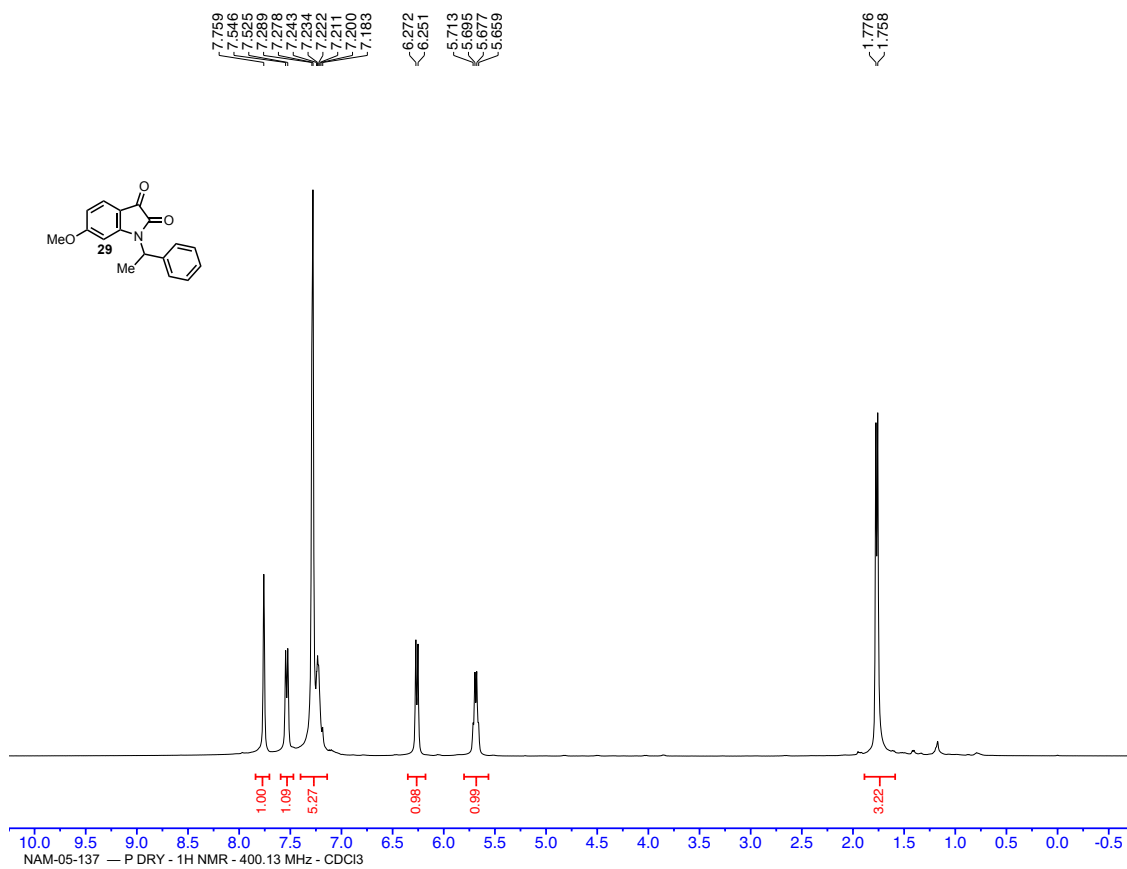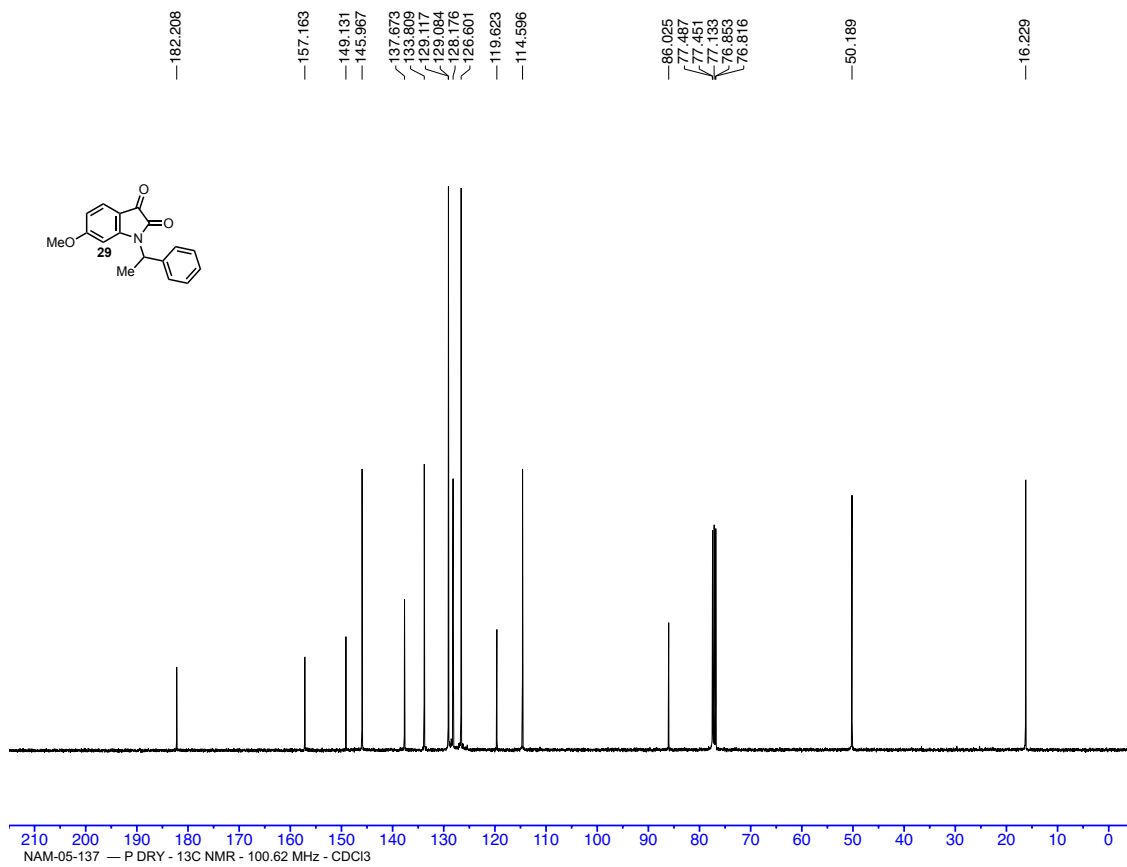



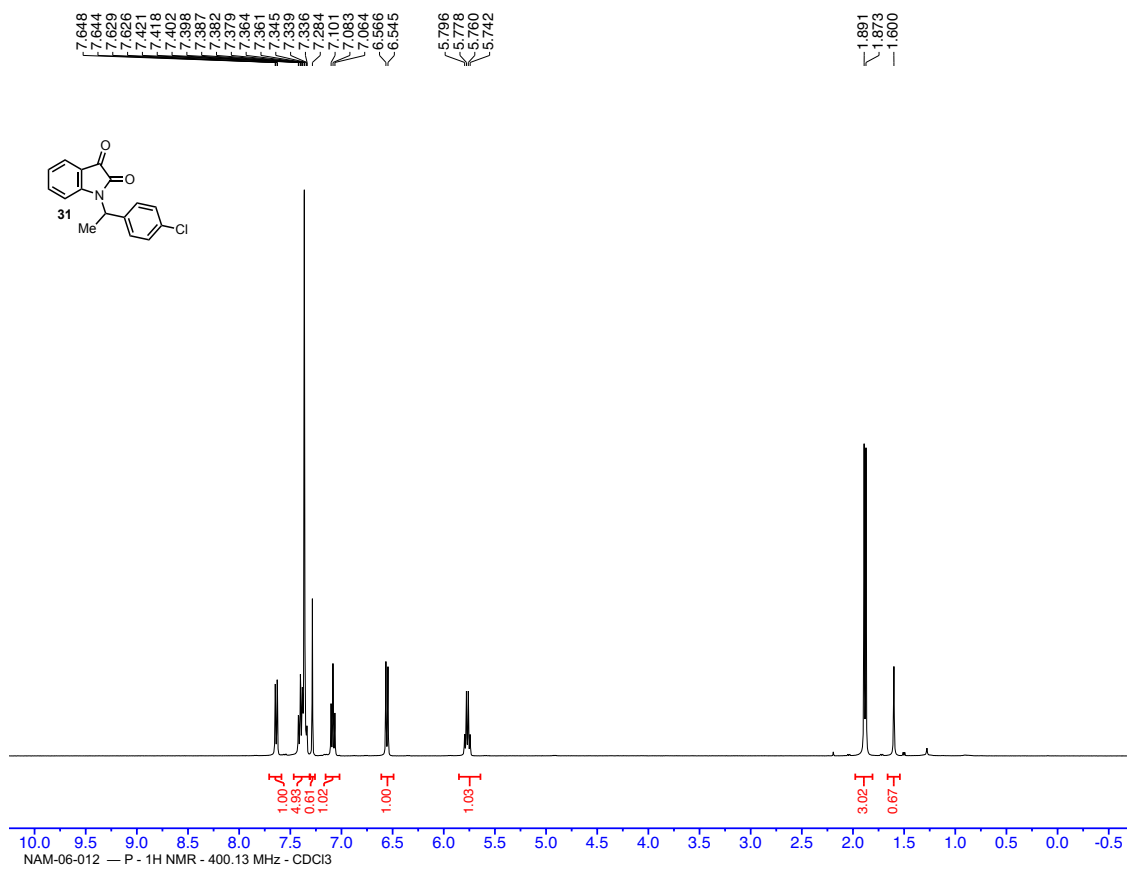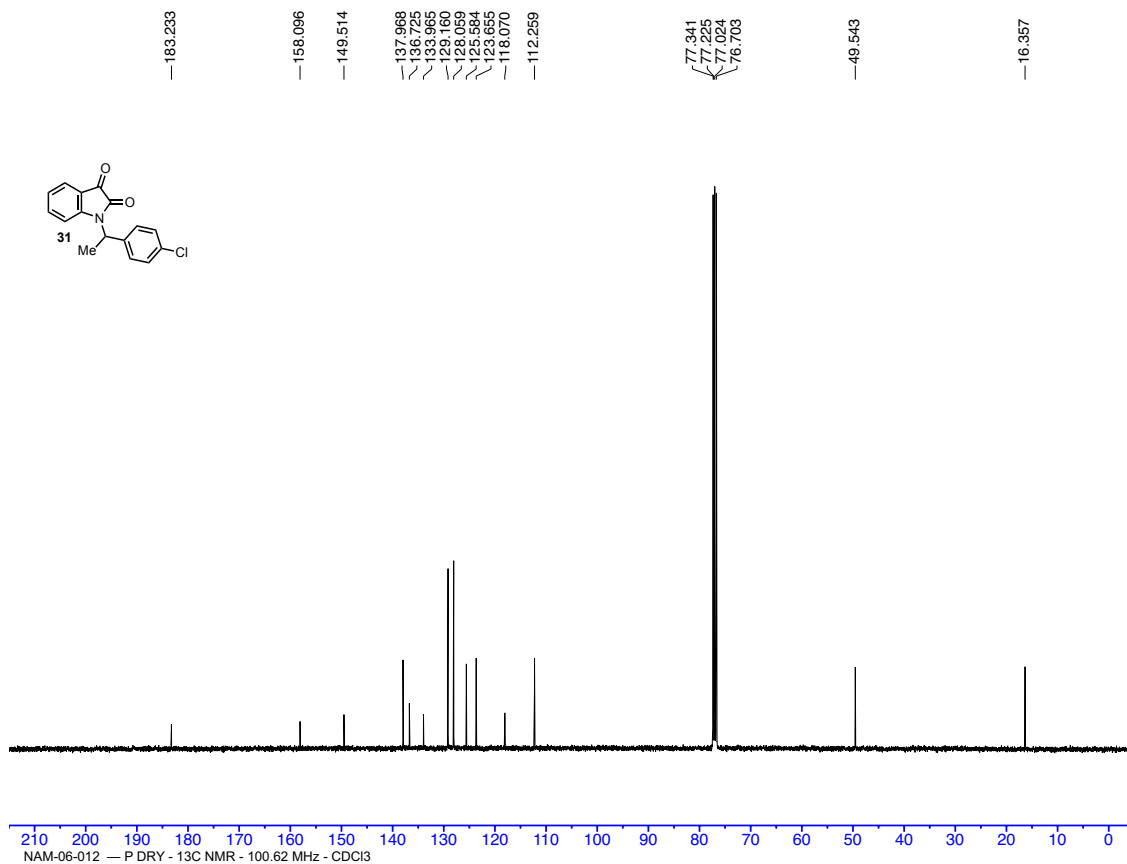

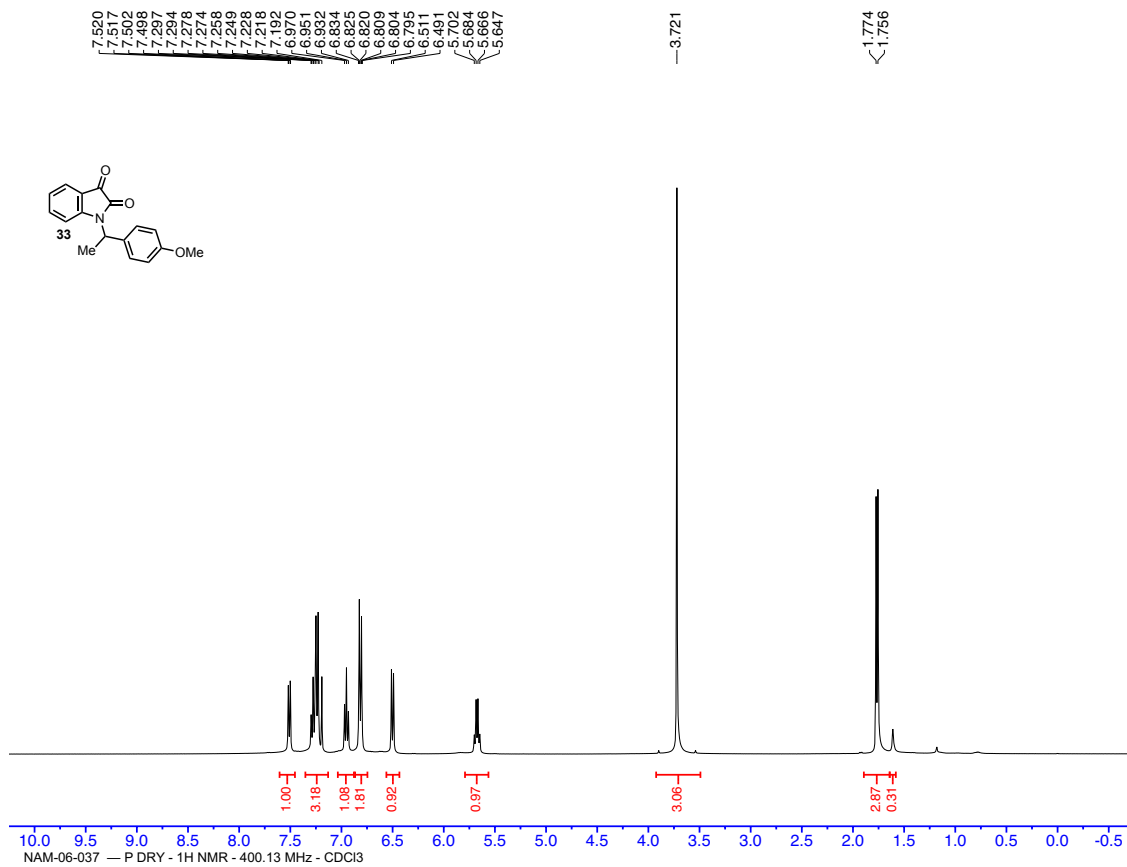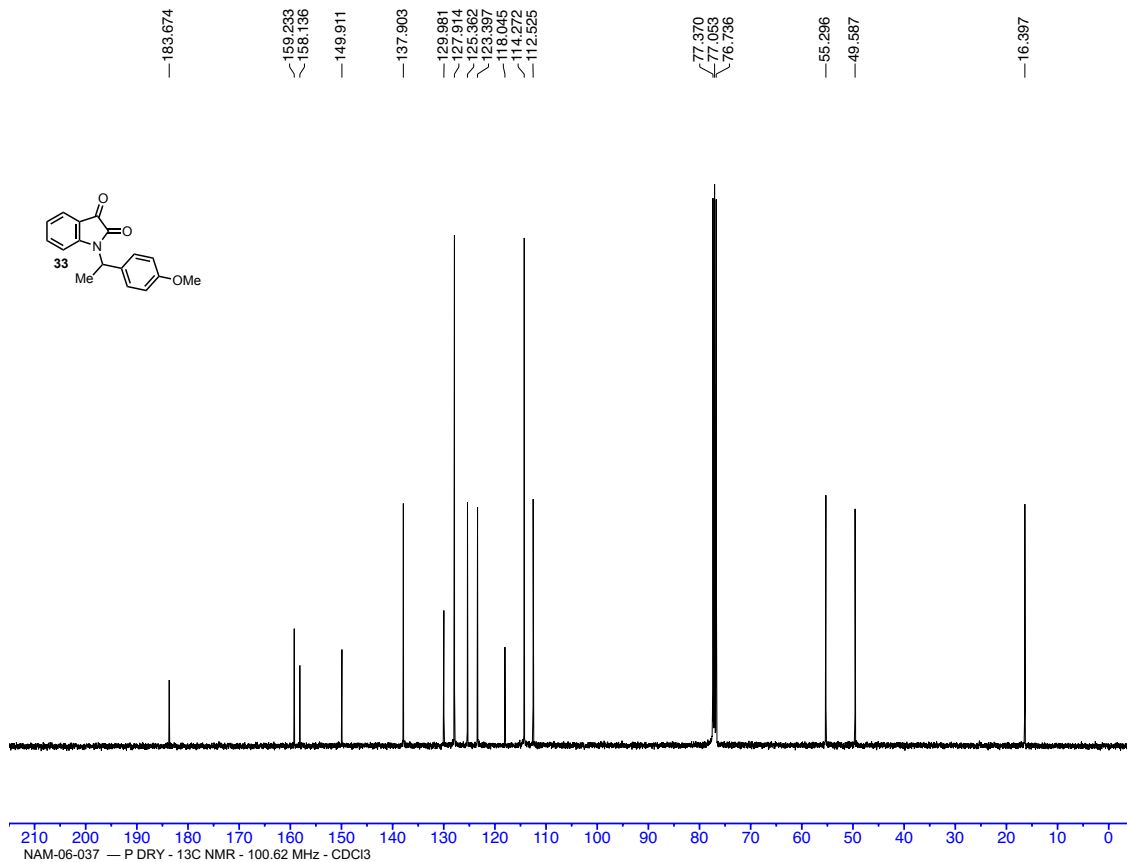

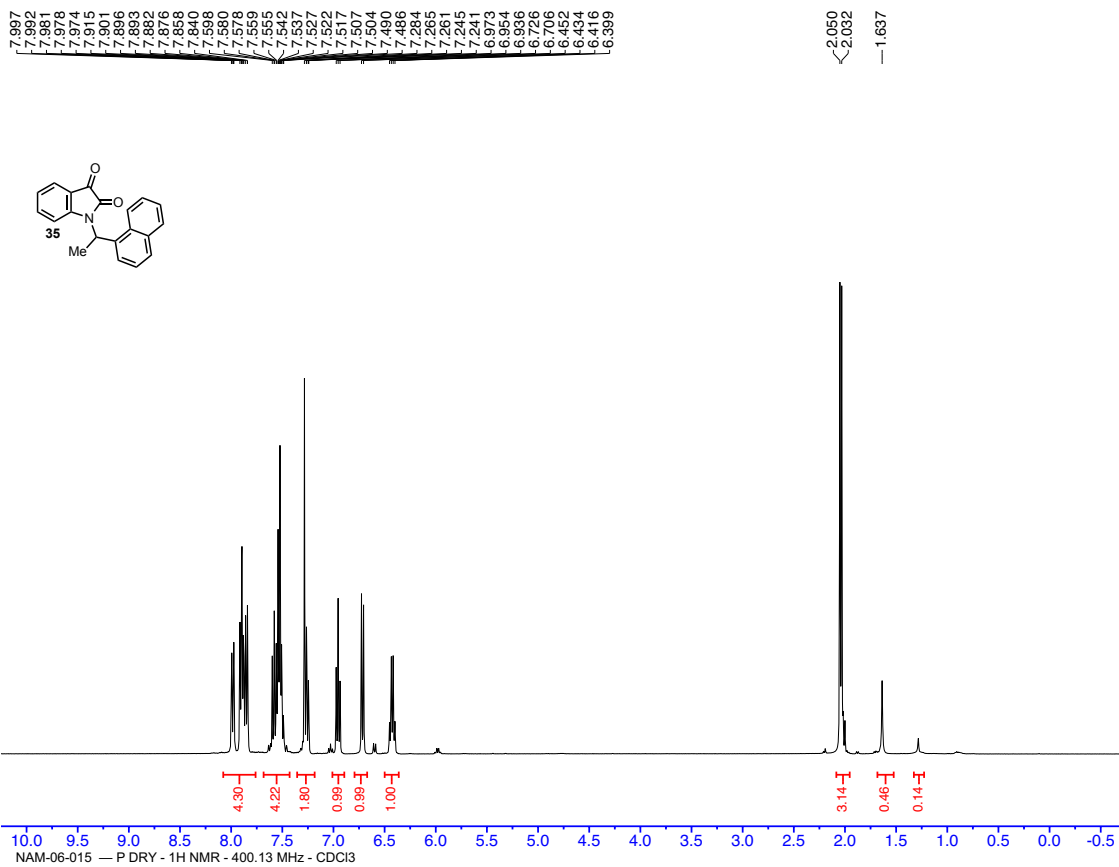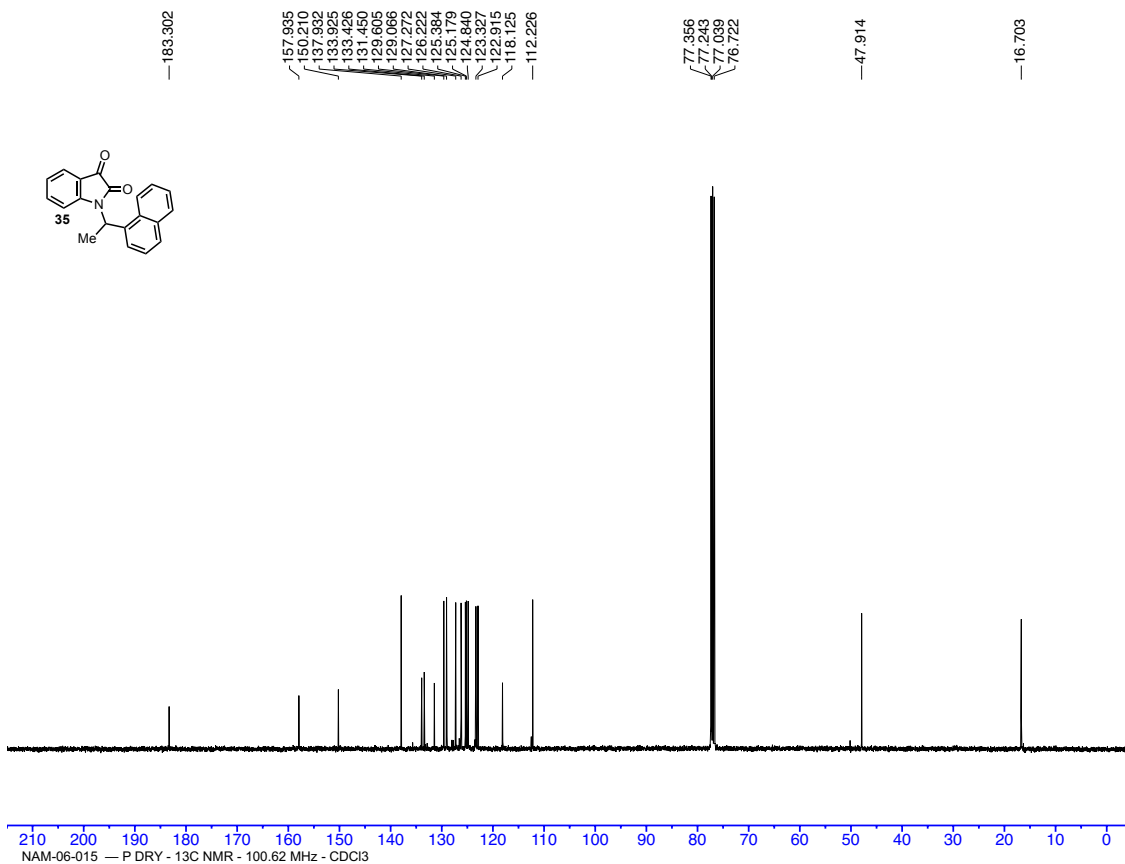

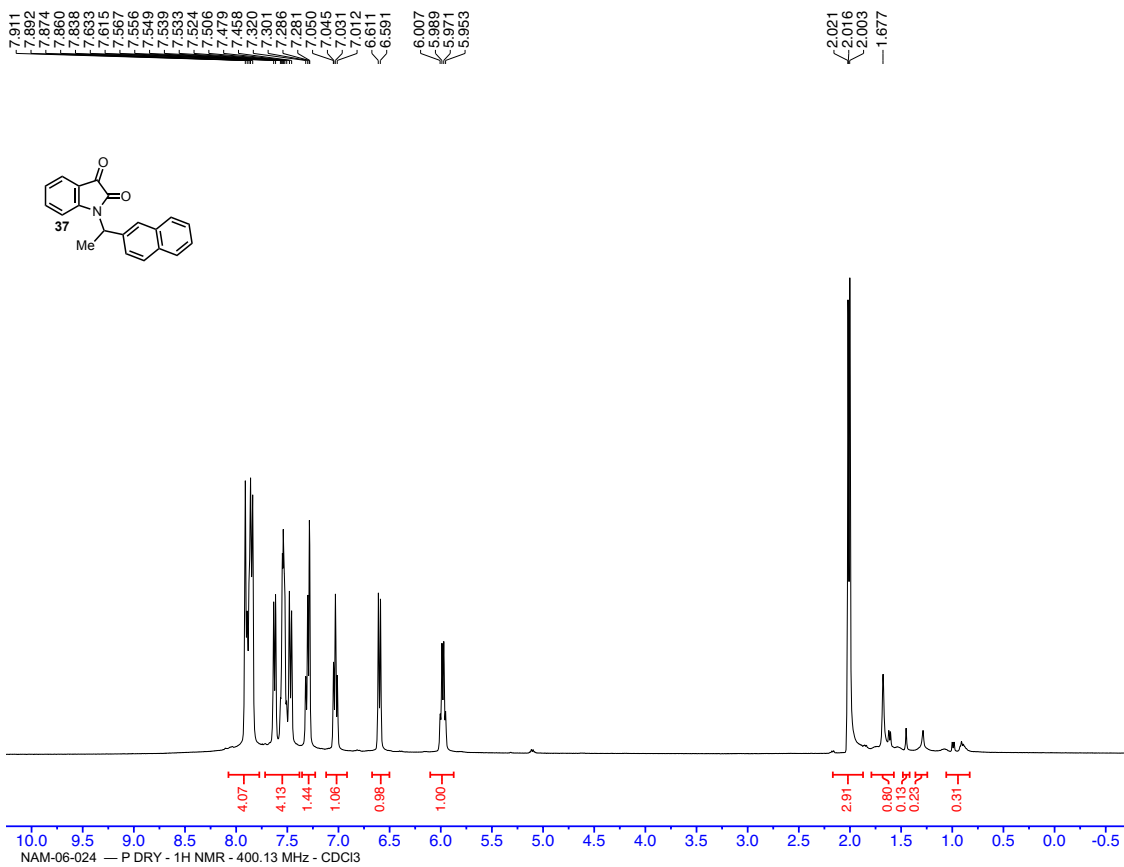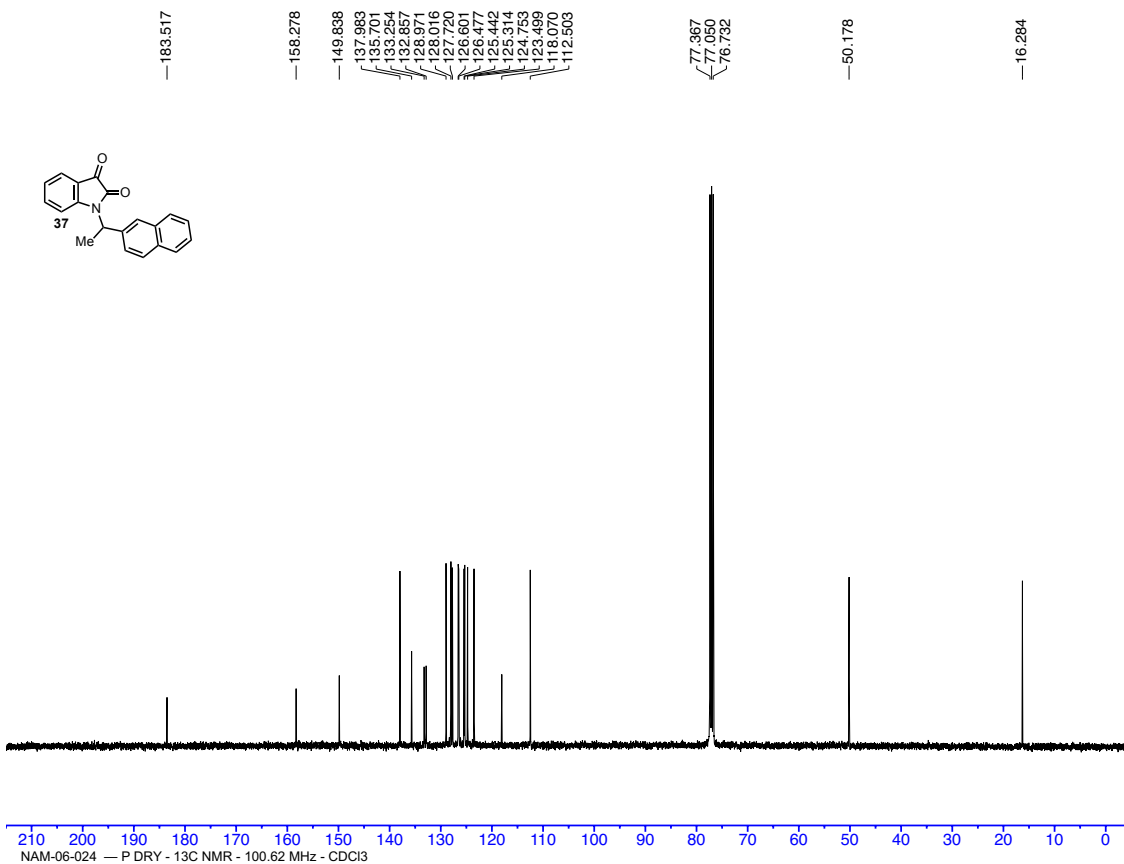

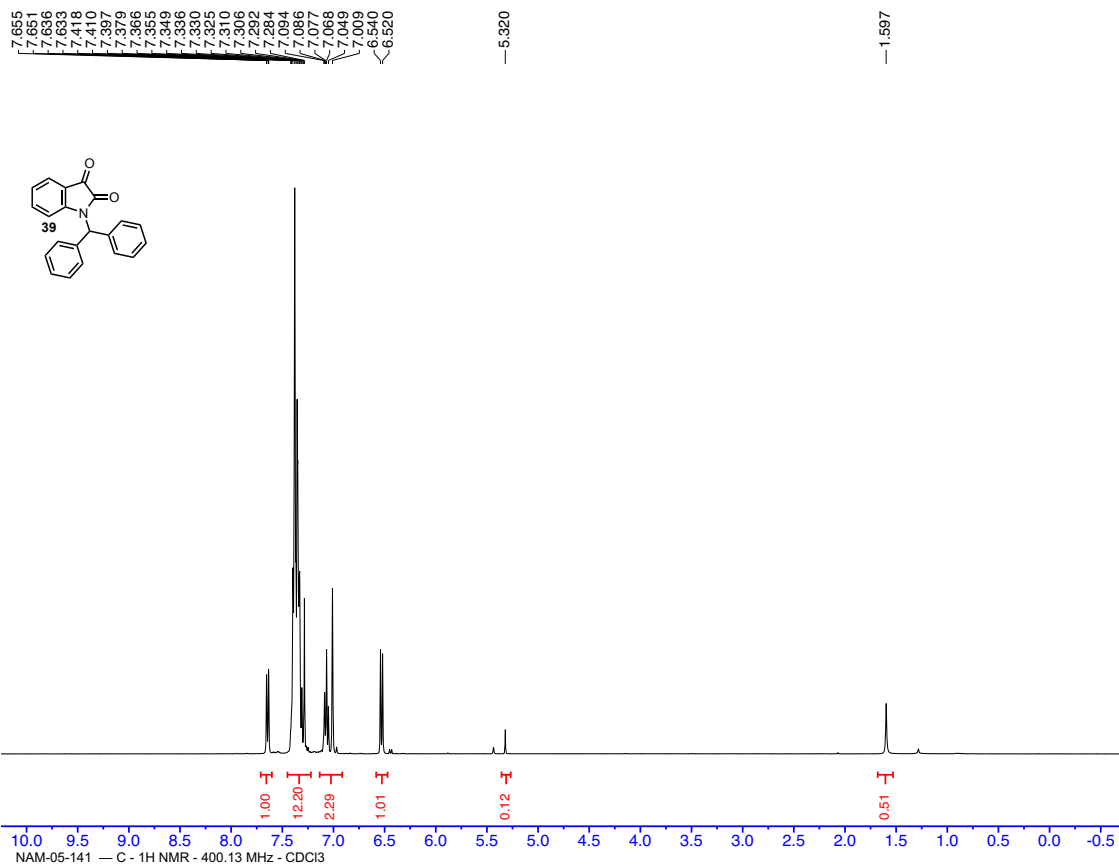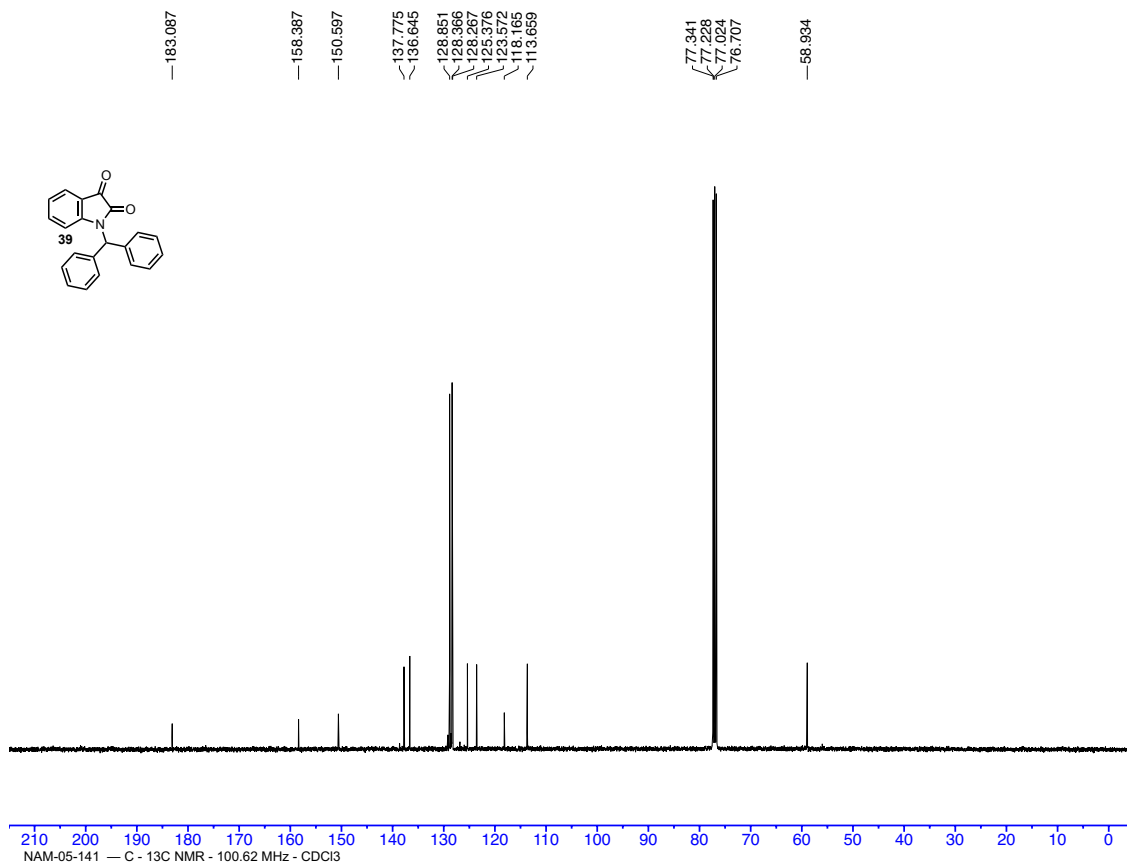

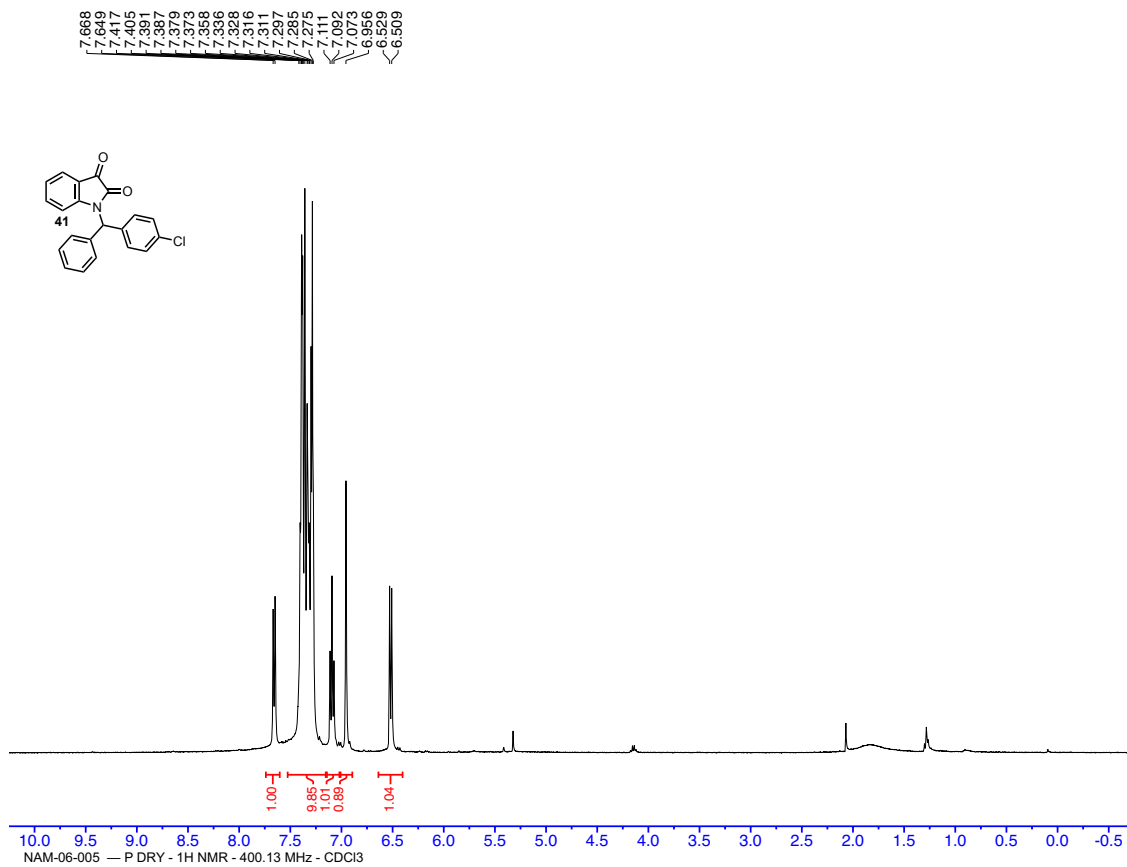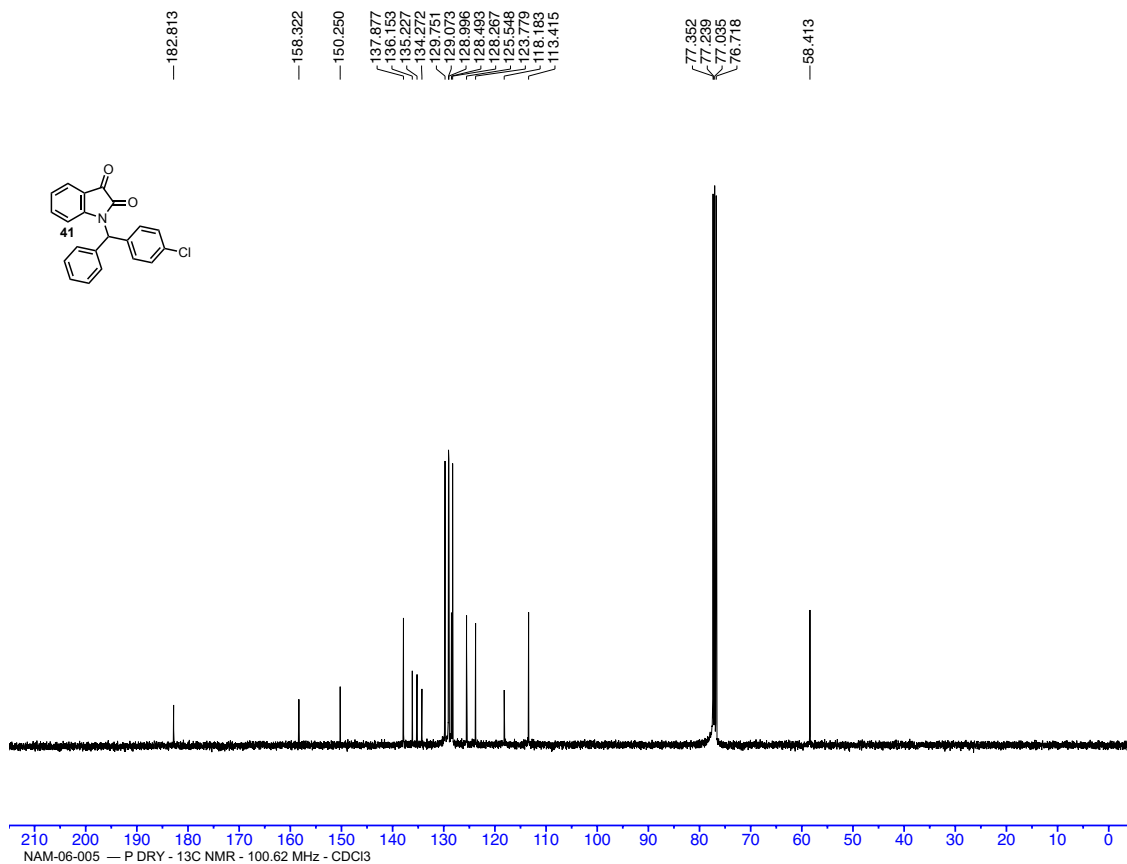

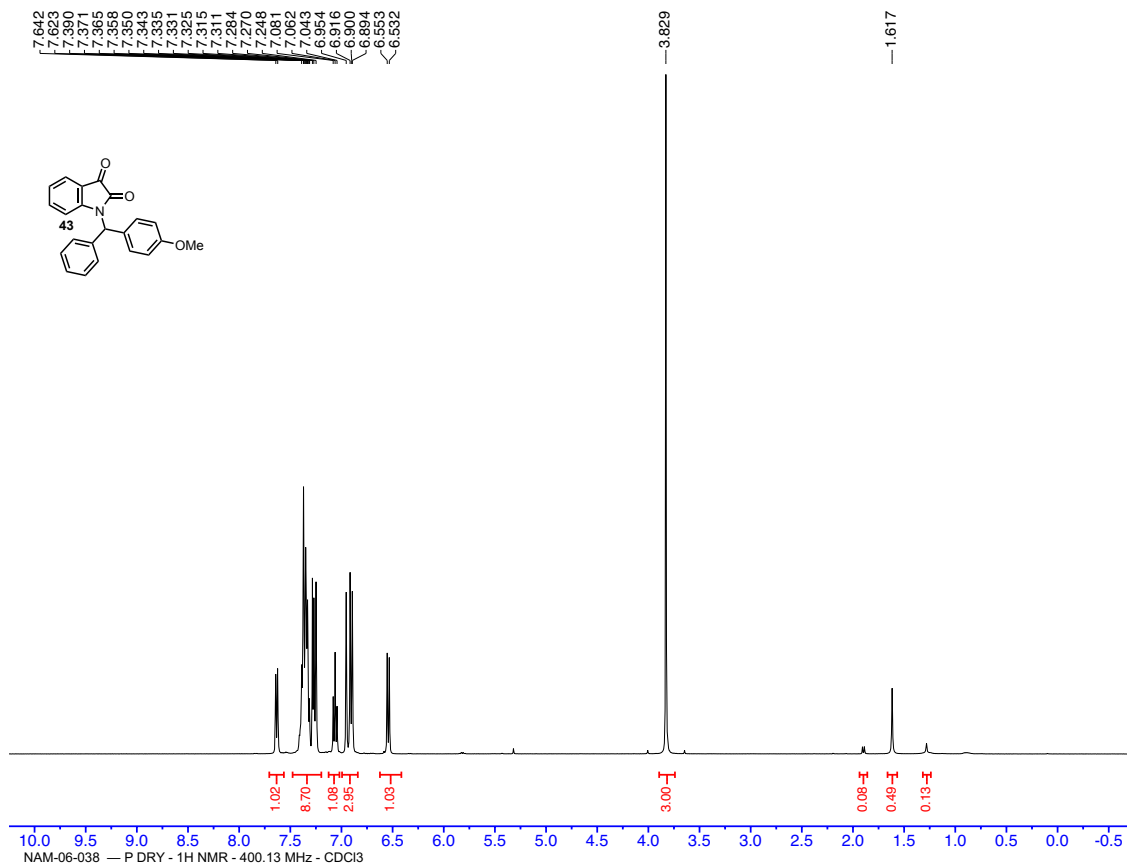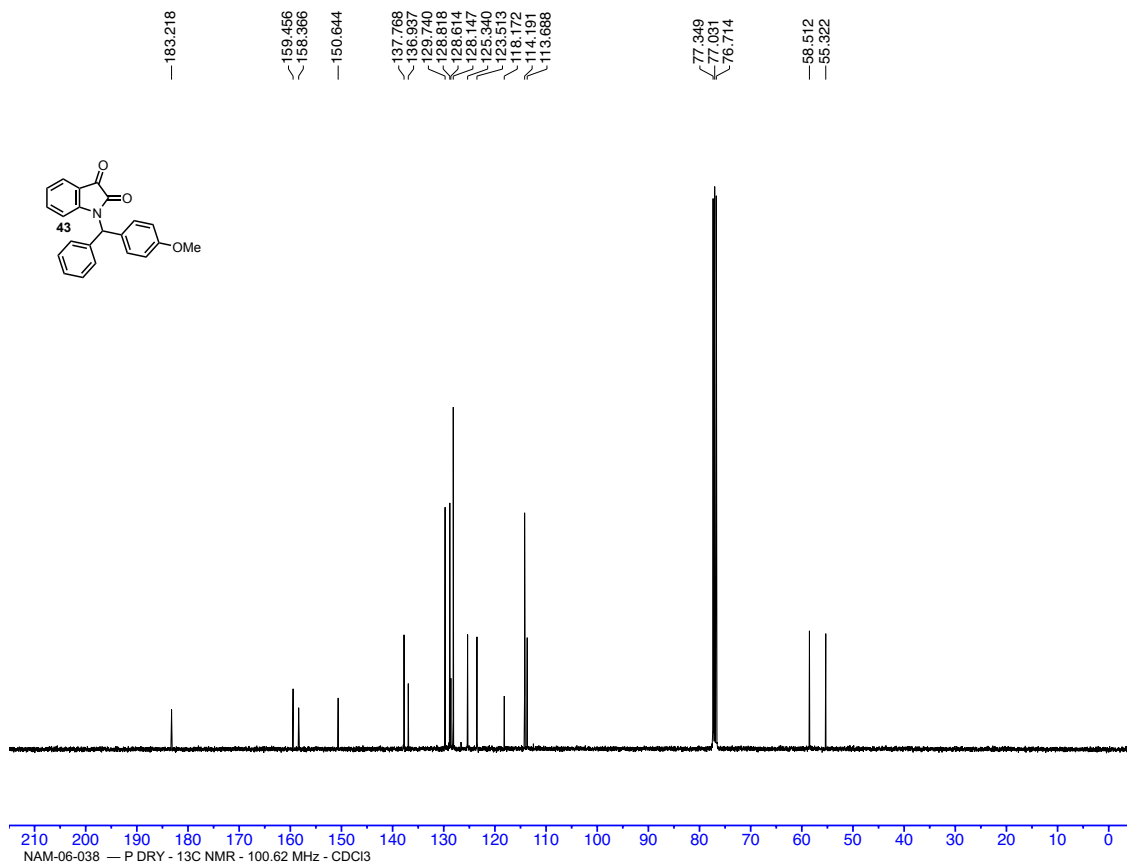

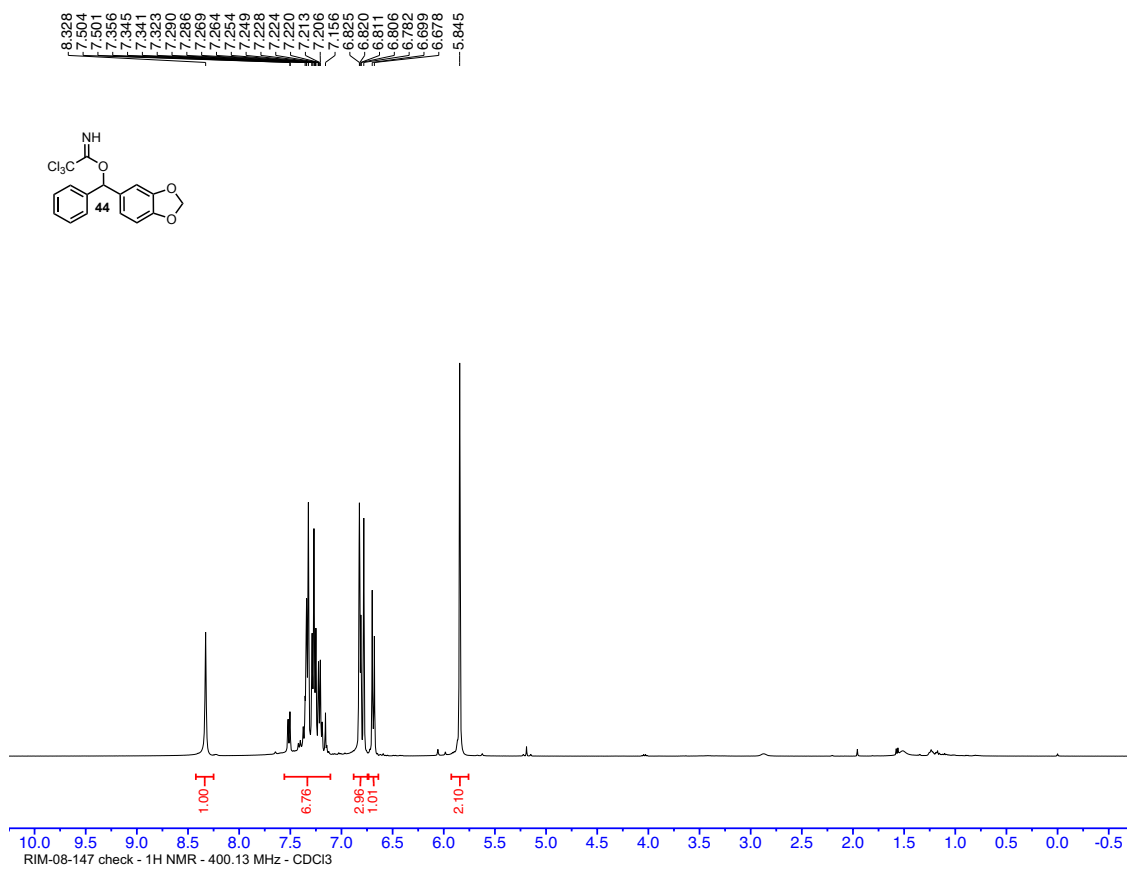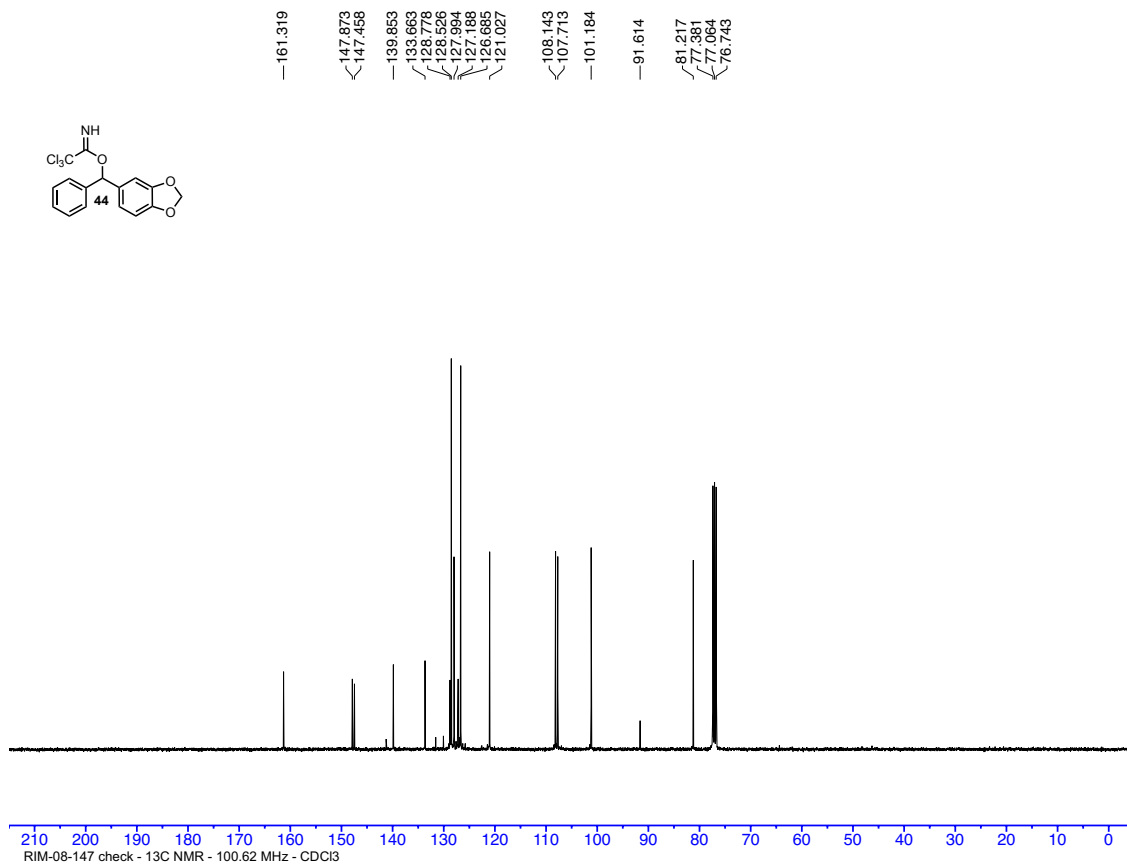



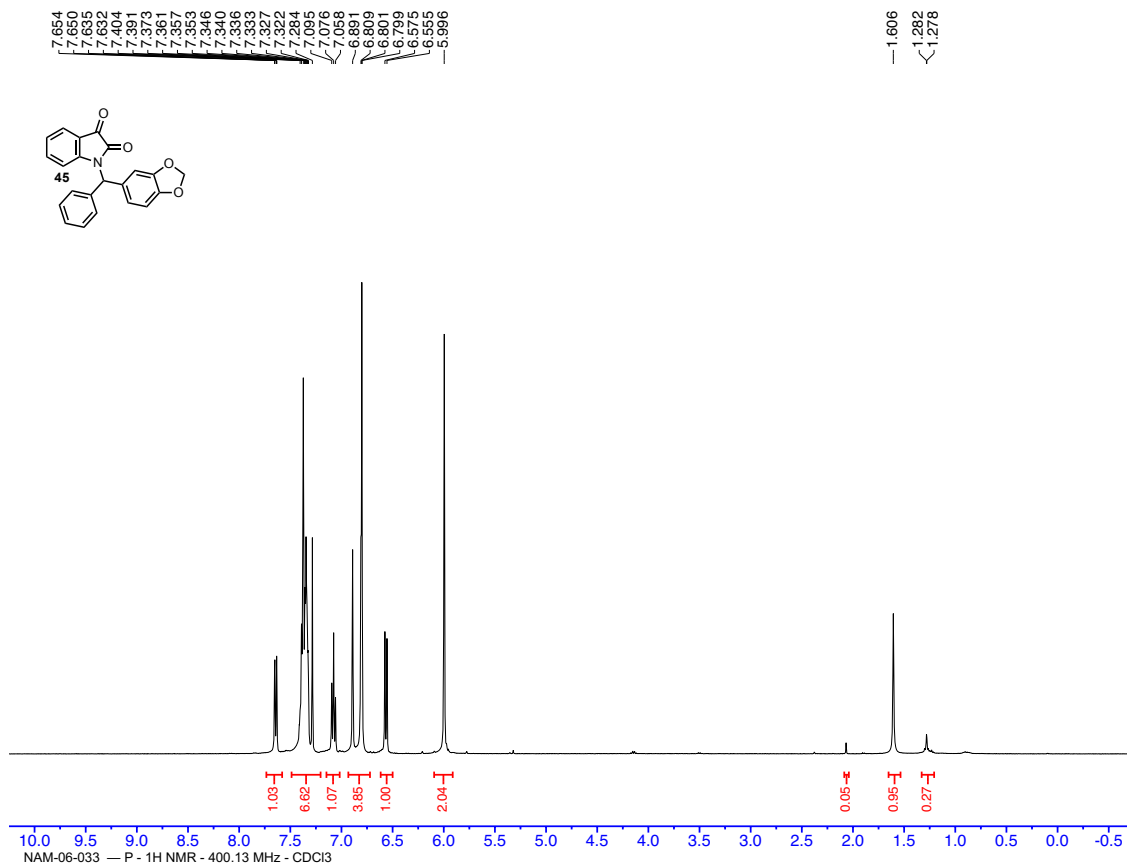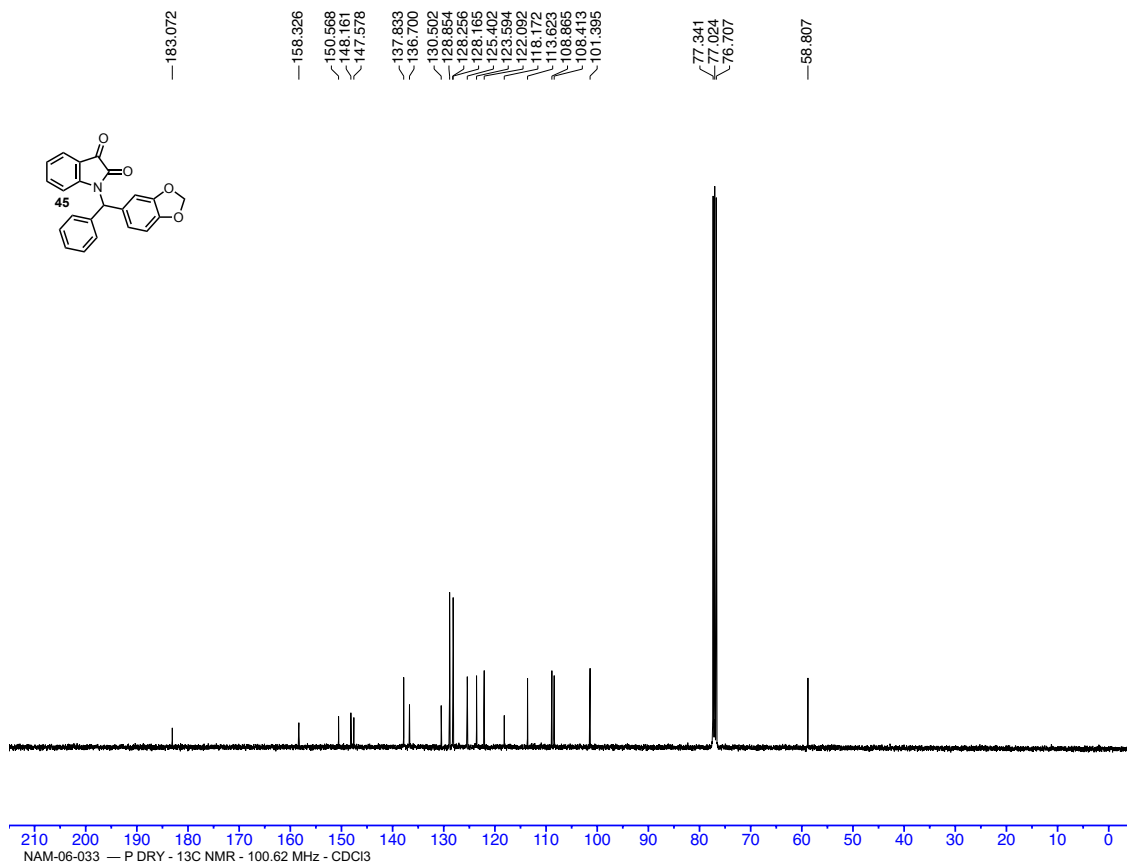

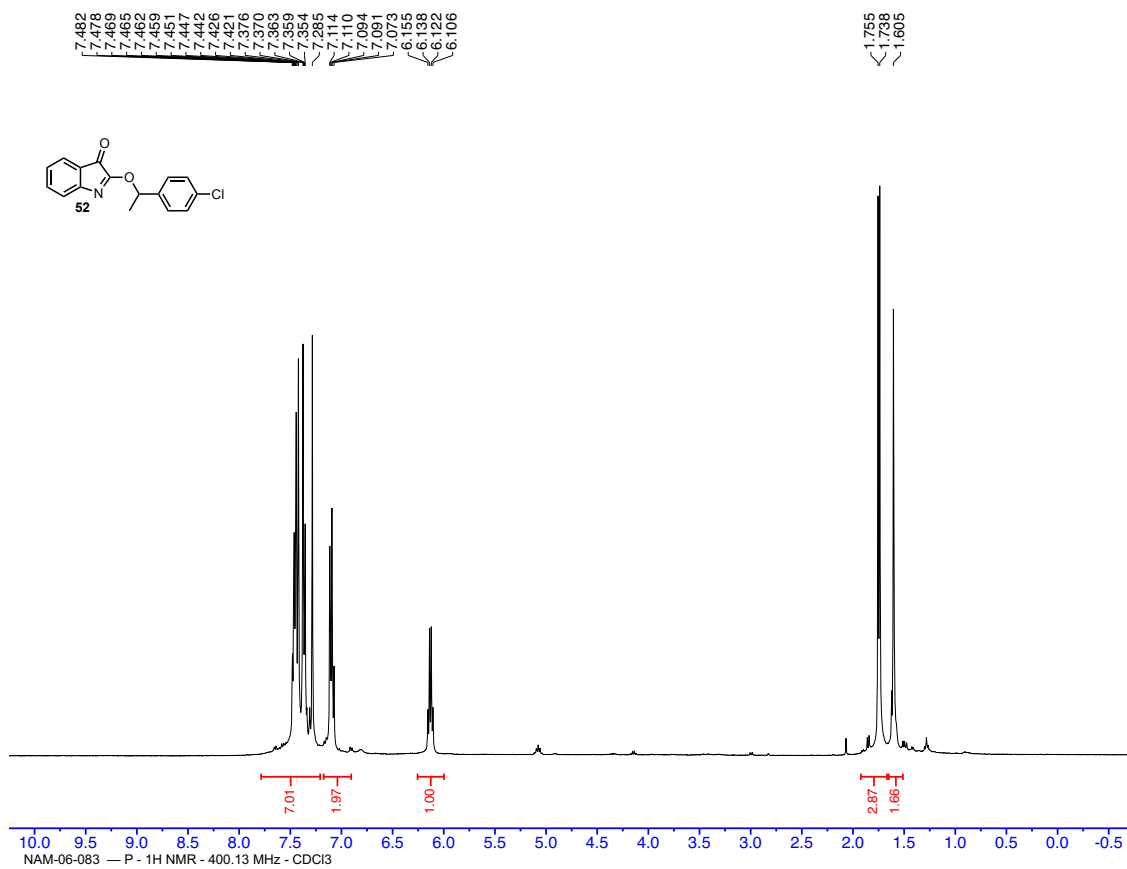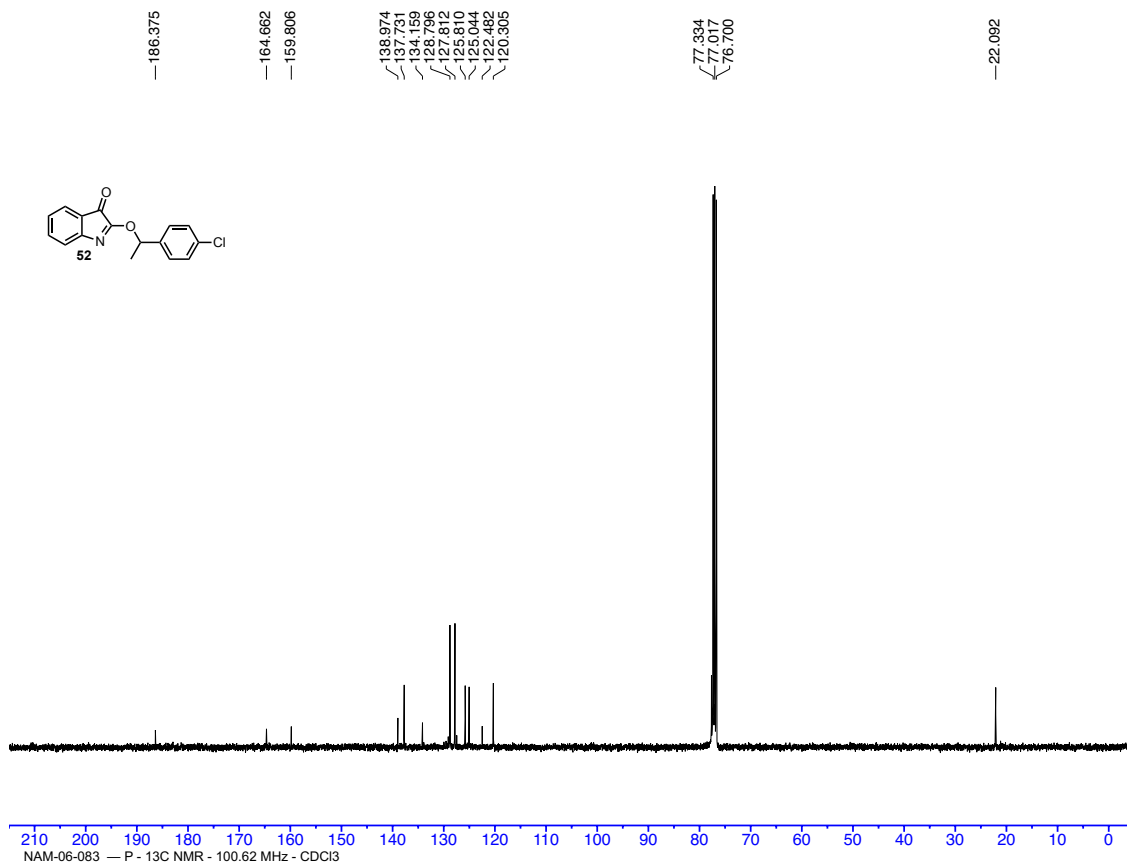

## References

- 1) Pangborn, A. B.; Giardello, M. A.; Grubbs, R. H.; Rosen, R. K.; Timmers, F. J. Safe and Convenient Procedure for Solvent Purification. *Organometallics* **1996**, *15*, 1518-1520.
- 2) Zhao, C.; Toste, F. D.; Raymond, K. N.; Bergman, R. G. Nucleophilic Substitution Catalyzed by a Supramolecular Cavity Proceeds with Retention of Absolute Stereochemistry. *J. Am. Chem. Soc.* **2014**, *136*, 14409-14412.
- 3) Adhikari, A. A.; Suzuki, T.; Gilbert, R. T.; Linaburg, M. R.; Chisholm, J. D. Rearrangement of Benzylic Trichloroacetimidates to Benzylic Trichloroacetamides. *J. Org. Chem.* **2017**, *82*, 3982-3989.
- 4) Zhang, Q.; Mixdorft, J. C.; Reynders, G. J.; Nguyen, H. M. Rhodium-catalyzed benzylic fluorination of trichloroacetimidates. *Tetrahedron* **2015**, *71*, 5932-5938.
- 5) Wallach, D. R.; Chisholm, J. D. Alkylation of Sulfonamides with Trichloroacetimidates under Thermal Conditions. *J. Org. Chem.* **2016**, *81*, 8035-8042.
- 6) Ali, I. A. I.; El Ashry, E. S. H.; Schmidt, R. R. Protection of Hydroxy Groups with Diphenylmethyl and 9-Fluorenyl Trichloroacetimidates - Effect on Anomeric Stereocontrol. *Eur. J. Org. Chem.* **2003**, 4121-4131.
- 7) Gois, P. M. P.; Trindade, A. F.; Veiros, L. F.; André, V.; Duarte, M. T.; Afonso, C. A. M.; Caddick, S.; Cloke, F. G. N. Tuning the Reactivity of Dirhodium(II) Complexes with Axial N-Heterocyclic Carbene Ligands: The Arylation of Aldehydes. *Angew Chem Int Ed Engl* **2007**, *46*, 5750-5753.
- 8) Hung, C.-Y.; Hsu, M.-H.; Huang, L.-J.; Hwang, C.-S.; Lee, O.; Wu, C.-Y.; Chen, C.-H.; Kuo, S.-C. Synthesis of 1-substituted 3-pyridinylmethylidenylindolin-2-ones and 1-substituted 3-quinolinylmethylidenylindolin-2-ones as the enhancers of ATRA-induced differentiation in HL-60 cells. *Bioorg. Med. Chem.* **2008**, *16*, 4222-4232.
- 9) Falconer, S. B.; Reid-Yu, S. A.; King, A. M.; Gehrke, S. S.; Wang, W.; Britten, J. F.; Coombes, B. K.; Wright, G. D.; Brown, E. D. Zinc Chelation by a Small-Molecule Adjuvant Potentiates Meropenem Activity in Vivo against NDM-1-Producing *Klebsiella pneumoniae*. *ACS Infect. Dis.* **2015**, *1*, 533-543.
